## Defining mucosal immunity using mass cytometry following experimental human pneumococcal challenge

Simon P. Jochems<sup>1,2,11,\*</sup>, Karin de Ruiter<sup>2,11</sup>, Carla Solórzano<sup>1,11</sup>, Astrid Voskamp<sup>2,11</sup>, Elena Mitsi<sup>1</sup>, Elissavet Nikolaou<sup>1</sup>, Beatriz F Carniel<sup>1</sup>, Sherin Pojar<sup>1</sup>, Esther L. German<sup>1</sup>, Jesús Reiné<sup>1</sup>, Alessandra Soares-Schanoski<sup>3</sup>, Helen Hill<sup>1,4</sup>, Rachel Robinson<sup>1,4</sup>, Angela D. Hyder-Wright<sup>1,4</sup>, Caroline M. Weight<sup>5</sup>, Pascal F. Durrenberger<sup>6</sup>, Robert S. Heyderman<sup>5</sup>, Stephen B. Gordon<sup>1,7</sup>, Hermelijn H. Smits<sup>2</sup>, Britta C. Urban<sup>8</sup>, Jamie Rylance<sup>1</sup>, Andrea M. Collins<sup>1,4,9</sup>, Mark D. Wilkie<sup>4</sup>, Lepa Lazarova<sup>1,4</sup>, Samuel C. Leong<sup>1,10</sup>, Maria Yazdanbakhsh<sup>2,12</sup>, Daniela M. Ferreira<sup>1,12,13\*</sup>

### Affiliations:

<sup>1</sup> Department of Clinical Sciences, Liverpool School of Tropical Medicine, Liverpool, United Kingdom

<sup>2</sup> Department of Parasitology, Leiden University Medical Center, Leiden, Netherlands

<sup>3</sup> Bacteriology Laboratory, Butantan Institute, Sao Paulo, Brazil

<sup>4</sup> Royal Liverpool and Broadgreen University Hospital, Liverpool, United Kingdom

<sup>5</sup> Division of Infection and Immunity, University College London, London, United Kingdom

<sup>6</sup> Centre for Inflammation and Tissue Repair, University College London, London, United Kingdom

<sup>7</sup> Malawi-Liverpool-Wellcome Trust Clinical Research Programme, Blantyre, Malawi

<sup>8</sup> Department of Parasitology, Liverpool School of Tropical Medicine, Liverpool, United Kingdom

<sup>9</sup> Aintree University Hospital NHS Foundation Trust, Liverpool, United Kingdom

<sup>10</sup> Department of Otorhinolaryngology – Head and Neck Surgery, Aintree University Hospital NHS Foundation Trust, Liverpool, United Kingdom

<sup>11</sup> These authors contributed equally

<sup>12</sup> Joint senior authors

\*Corresponding authors: Simon Jochems ([s.p.jochems@lumc.nl](mailto:s.p.jochems@lumc.nl)) and Daniela Ferreira ([daniela.ferreira@liverpool.ac.uk](mailto:daniela.ferreira@liverpool.ac.uk)).

<sup>13</sup> Lead contact

1 **Summary**

2 *Streptococcus pneumoniae* (Spn) is a common cause of respiratory infection, but also frequently  
3 colonises the nasopharynx in the absence of disease. We used mass cytometry to study immune  
4 cells from nasal biopsy samples, collected following experimental human pneumococcal challenge,  
5 in order to identify immunological changes that follow and control spn colonisation. Using 37  
6 markers, we characterized 293 nasal immune cell clusters, of which 7 were associated with Spn  
7 colonisation. B cell and CD8<sup>+</sup>CD161<sup>+</sup> T cell clusters were significantly higher in non-colonised than  
8 in colonised subjects. Spn colonization led to recirculation of not only Spn-specific but also  
9 aspecific nasal B cells. This associated with increased numbers of circulating plasmablasts and  
10 increased antibody levels against the unrelated bacterium *Haemophilus influenzae*. In addition, we  
11 demonstrated that baseline functionality of blood mucosal associated invariant T (MAIT) cells  
12 associated with protection against Spn. These results identify new host-pathogen interactions at  
13 the mucosa upon Spn colonisation.

14

15 **Keywords**

16 *Streptococcus pneumoniae*, Colonisation, Host-pathogen interaction, Mass cytometry, CyTOF,  
17 Controlled human infection, B cells, Mucosal immunology, mucosal associated invariant T cells,  
18 MAIT cells.

## 19 **Introduction**

20 *Streptococcus pneumoniae* (Spn) is a major cause of morbidity and mortality worldwide (O'Brien et  
21 al., 2009; Welte et al., 2012). However, nasopharyngeal colonisation, or carriage, of Spn in the  
22 absence of disease is common, with approximately 50% of infants and 10% of adults colonised at  
23 any time (Goldblatt et al., 2005). Carriage is an immunising event in both children and adults but is  
24 also important as a prerequisite of disease and as the source of transmission (Ferreira et al., 2013;  
25 McCool et al., 2002; Melegaro et al., 2004; Simell et al., 2012).

26 Mouse models have suggested that Th17-mediated recruitment of neutrophils and monocytes to  
27 the nasopharynx is the mechanism of control and clearance of Spn carriage (Lu et al., 2008; Lu et  
28 al., 2010; Zhang et al., 2009). Recently, we demonstrated using an experimental human  
29 pneumococcal challenge (EHPC) model that carriage leads to degranulation of nasal-resident  
30 neutrophils and recruitment of monocytes to the nasal mucosal surface (Jochems et al., 2018).  
31 Protection against carriage acquisition was associated with the levels of circulating memory B  
32 cells, but not levels of IgG, directed against the Spn polysaccharide capsule (Pennington et al.,  
33 2016). However, the relative role of these and other adaptive and innate immune cell subsets in  
34 controlling Spn at the human nasal mucosa remains largely unknown (Khan and Pichichero, 2014).

35 Here, we applied mass cytometry (CyTOF) to nasal biopsies collected following experimental  
36 human pneumococcal challenge to comprehensively study mucosal immunity to Spn carriage.

## 37 **Results**

### 38 **Characterization of nasal immune populations**

39 Twenty healthy subjects negative for natural pneumococcal carriage at baseline screening were  
40 challenged intranasally with type 6B Spn (Fig. 1A and Table 1). Carriage state was assessed at  
41 days two and seven post challenge and a nasal biopsy was collected at ten days post challenge  
42 (Supplementary Video 1), the timepoint at which Spn starts to be cleared from the nose (Gritzfeld  
43 et al., 2014; Rylance et al., 2018). Eight subjects became colonized with Spn (carriage<sup>+</sup>), while

44 twelve subjects remained carriage<sup>-</sup> (Fig. 1A). Biopsies yielded a median of  $2.3 \times 10^5$  cells (IQR:  
45  $1.6 \times 10^5$  -  $3.2 \times 10^5$ ) per subject, approximately 90% of which were stromal cells, which were stained  
46 with a panel of thirty-eight antibodies and analysed by CyTOF (Fig. 1B, Supplementary Table 1).  
47 Viable immune cells were manually gated from all acquired events and subsequently clustered by  
48 hierarchical-stochastic neighbour embedding (h-sne) using Cytosplore software (Fig. 1C,2)  
49 (Abdelmoula et al., 2018; Holtt et al., 2016; van Unen et al., 2017). H-sne is a recently developed  
50 method in which t-distributed stochastic neighbor embedding (t-sne) is performed sequentially to  
51 cluster first global cell populations, each of which is then in turn clustered into subpopulations.

52 Based on the expression of 37 markers, a total of 199,426 immune cells from all subjects were  
53 divided into nine lineages (CD8<sup>+</sup> T cells, CD4<sup>+</sup> T cells, myeloid cells, innate lymphoid cells, B cells,  
54 double-negative T cells, granulocytes, CD117<sup>+</sup> cells and plasma cells, in order of decreasing  
55 abundance). These cell lineages were further divided into twenty-two subpopulations and 293  
56 clusters (Fig. 1C and Table 2). Cell numbers were normalized to the number of stromal cells for  
57 each subject to correct for varying biopsy yields. Normalized abundancies were then compared  
58 between carriage<sup>-</sup> and carriage<sup>+</sup> subjects for each of the lineages, subpopulations and clusters.  
59 There were no significant differences in frequencies between total lineages or subpopulations  
60 between carriage<sup>-</sup> and carriage<sup>+</sup> subjects. However, at a finer level seven clusters were  
61 significantly higher in carriage<sup>-</sup> than in carriage<sup>+</sup> subjects (Fig. 1C, blue bars). Of note, three B cell  
62 clusters were higher in carriage<sup>-</sup> subjects (Fig. 1C). Moreover, three CD8<sup>+</sup> T cell clusters, all  
63 expressing CD161, and one CD8<sup>dim</sup> T cell cluster were higher in carriage<sup>-</sup> subjects than in  
64 carriage<sup>+</sup> subjects (Fig. 1C). The seven significant clusters strongly correlated ( $r > 0.70$ ) with eighty-  
65 eight clusters in other lineages/subpopulations, sixty-eight of which were in B or T cell lineages,  
66 highlighting an interconnectivity between B and T cell subpopulations in the human nasopharynx  
67 (Fig. 1C).

68 **Nasal B cells are depleted during pneumococcal carriage**

69 We then further investigated the three B cell clusters that were higher in carriage<sup>-</sup> subjects (Fig.  
70 3A,B). All three significantly higher clusters (cluster 4, 9 and 17) expressed CD45RA, HLA-DR,  
71 CD19, CCR6 and CCR7 to varying degrees. None of these clusters expressed CD38, a marker for  
72 plasmablasts, or CD5, a marker for innate B cells (Hardy, 2006; Jourdan et al., 2011). Cluster 9  
73 was 2.9-fold higher in carriage<sup>-</sup> subjects ( $p = 0.047$ ) and cells in this cluster expressed also low  
74 levels of CXCR5 and CD27. Cluster 17 (2.0-fold higher,  $p = 0.049$ ) additionally expressed the B  
75 cell activation marker CD69. To assess whether the higher frequency in carriage<sup>-</sup> subjects was  
76 related to increased B cells in carriage<sup>-</sup> subjects or decreased B cells in carriage<sup>+</sup> subjects, we  
77 longitudinally measured CD19<sup>+</sup> B cell frequencies in nasal microsamples collected from an  
78 independent cohort (Fig. 3C and Supplementary Fig. 1A). Compared to baseline, B cell levels  
79 decreased following pneumococcal carriage at days 2 (2.1-fold,  $p = 0.012$ ), 6 (2.8-fold), 9 (2.0-fold)  
80 and 27 (3.1-fold,  $p = 0.007$ ) post-inoculation. In the carriage<sup>-</sup> group, B cell levels decreased 1.1-  
81 fold at days 2 and 6, increased 1.2-fold at day 9 and decreased 1.2-fold at day 27, respectively and  
82 were thus relatively stable.

### 83 **Pneumococcal carriage increases circulating plasmablasts**

84 We hypothesized that the depletion of B cells from the nasal mucosa following carriage  
85 establishment was due to a re-circulation of activated B cells. Numbers of Spn-specific and total  
86 plasmablasts were measured in peripheral blood mononuclear cells (PBMC) collected before and  
87 after carriage establishment using a flow cytometry-based assay (Supplementary Fig. 1B). During  
88 carriage, the frequency of 6B polysaccharide-specific plasmablasts among total B cells increased  
89 while the frequency of plasmablasts specific to the pneumococcal protein pneumolysin remained  
90 unaltered (Fig. 4A). As a negative control we measured levels of plasmablasts specific for an  
91 unrelated Spn capsular type (15B), which were not affected as expected. However, the frequency  
92 of total circulating plasmablasts among all B cells increased (median 1.5x, IQR: 1.2-2.8x;  $p =$   
93 0.008) suggesting that nasal B cells became non-specifically activated during carriage. Similar  
94 results were obtained when normalizing to the total number of lymphocytes, demonstrating this

95 was not due to other shifting B cell populations (Supplementary Fig. 2A). We then investigated  
96 CCR10 expression on these plasmablasts, which has been reported to mark IgA secreting cells  
97 (Morteau et al., 2008) and is potentially important for homing of B cells to mucosal tissues  
98 including the airways (Kato et al., 2013; van Splunter et al., 2018). The total population of  
99 plasmablasts post carriage displayed reduced numbers of CCR10<sup>+</sup> cells, in contrast to 6B-specific  
100 plasmablasts, indicating differential expansion between specific and non-specific B cell populations  
101 (Fig. 4B). This is supported by the observation that increased circulating levels of 6B  
102 polysaccharide-specific plasmablasts inversely correlated with the nasal B cell CyTOF clusters 9  
103 and 20, while total plasmablast increases inversely correlated with the CyTOF B cell clusters 21  
104 (Fig. 4C). Clusters 9 and 21 still negatively correlated with levels of circulating 6B-specific and total  
105 plasmablasts, respectively, after normalization to total lymphocyte numbers (Supplementary Fig.  
106 2B). Thus, it is likely that both polysaccharide-specific as well as unrelated B cells became  
107 activated following carriage, leading to recirculation. We then measured antibody levels in serum  
108 against not only Spn but also *Streptococcus pyogenes*, *Staphylococcus aureus* and *Haemophilus*  
109 *influenzae* as these are common colonizers of the human nasopharynx and thus nasal B cells  
110 against these bacterial species are likely present in the nose of most individuals. Following Spn  
111 colonisation, IgG levels specific for Spn (median 1.4x, IQR: 1.1-2.4) and *Haemophilus influenzae*  
112 (median 1.2x, IQR: 1.1-1.5) significantly increased, while IgG levels specific for *Streptococcus*  
113 *pyogenes* and *Staphylococcus aureus* were not significantly altered (Fig. 4D). Consistent with the  
114 decrease in CCR10 levels on total plasmablasts but not on 6B-specific plasmablasts, serum levels  
115 of specific IgA only increased for Spn and not for *Haemophilus influenzae* or any of the other  
116 bacterial species (Fig. 4E).

### 117 **Nasal CD8 Tissue-resident memory T cells are higher in carriage<sup>-</sup> subjects**

118 The three clusters of CD8<sup>+</sup> T cells and the cluster of CD8<sup>dim</sup> T cells that were higher in carriage<sup>-</sup>  
119 subjects all expressed CD69, a marker of tissue-resident memory (Trm) cells (Fig. 5A). To verify  
120 that these CD69<sup>+</sup> CD8<sup>+</sup> T cells represented Trm cells, we measured the expression of CD103 and

121 CD49a on CD69<sup>+</sup> and CD69<sup>-</sup> cells by flow cytometry from a representative biopsy (Supplementary  
122 Fig. 3A). Indeed, 89.1% of nasal CD69<sup>+</sup> CD8<sup>+</sup> T cells expressed CD103 and CD49a, confirming  
123 that these were Trm cells (Fig. 5B) (Kumar et al., 2017). The markers CD5, CD38, HLA-DR,  
124 CCR6, CD127, CCR7 and CD11c were expressed in cluster-specific patterns and at varying  
125 intensities among the significant clusters. This suggests that clusters of cells with varying degrees  
126 of activation and memory types were enriched in carriage<sup>-</sup> subjects. One cluster expressed only  
127 low levels of CD8 (cluster 10 of CD8<sup>dim</sup> T cells, 2.0-fold higher,  $p = 0.016$ ), which could reflect  
128 cytotoxic effector memory cells (Trautmann et al., 2003). We then stimulated nasal biopsy cells  
129 and PBMC overnight with PMA and ionomycin to assess the functional capacity of nasal CD8<sup>+</sup> T  
130 cells (Fig. 5C). Among nasal CD8<sup>+</sup> T cells, 94.8% produced tumor necrosis factor alpha (TNF)  
131 and/or interferon gamma (IFN- $\gamma$ ) following stimulation, compared to 36% of blood CD8<sup>+</sup> T cells,  
132 demonstrating that nasal CD8<sup>+</sup> T cells are highly functional.

### 133 **Baseline circulating MAIT functionality associates with resistance to pneumococcal** 134 **carriage**

135 Three of the four significant clusters expressed CD161, a marker for mucosal associated invariant  
136 T (MAIT) cells, and we therefore tested the hypothesis that MAIT cell responses against Spn were  
137 associated with protection against carriage. PBMC collected prior to pneumococcal challenge were  
138 stimulated *in vitro* with heat-inactivated Spn and activation (CD69) and cytokine production (TNF,  
139 IFN- $\gamma$  and IL-17A) were assessed (Supplementary Fig. 3B). MAIT cells of both carriage<sup>-</sup> and  
140 carriage<sup>+</sup> groups upregulated CD69 after a 3-day culture with heat-inactivated Spn (Supplementary  
141 Fig. 3C). However, only MAIT cells from carriage<sup>-</sup> subjects produced increased levels of TNF and  
142 IFN- $\gamma$ , but not IL-17A, upon restimulation *in vitro* with heat-inactivated Spn (Fig. 5D). Conversely,  
143 MAIT cells from carriage<sup>+</sup> subjects did not produce increased levels of any cytokine upon  
144 stimulation. This was specific to MAIT cells as conventional CD8<sup>+</sup> T cells responded by producing  
145 small amounts of IFN- $\gamma$  and no TNF (Supplementary Fig. 3D). The baseline responses of MAIT  
146 cells in blood upon restimulation showed a positive correlation with numbers of nasal cells at ten

147 days post pneumococcal challenge in CyTOF CD161<sup>+</sup> CD8<sup>+</sup> T cell cluster 9, which was  
148 significantly higher in the carriage<sup>-</sup> group ( $r = 0.54$ ,  $p = 0.02$ , Fig. 5E).

#### 149 **Nasal monocytes show limited differentiation into macrophages**

150 Monocytes have been previously associated with the clearance of Spn carriage (Jochems et al.,  
151 2018; Zhang et al., 2009), however these cells have not been previously phenotyped in detail in  
152 the human nasopharynx. Of the twenty-five clusters defined in the myeloid lineage, fifteen  
153 expressed CD14 (Supplementary Fig. 4). Of these, only two also expressed CD16. Four CD14<sup>+</sup>  
154 clusters expressed the macrophage markers CD163 and CD206 and an additional three clusters  
155 expressed CD206 but not CD163 (Kaku et al., 2014). However, alveolar monocytes can express  
156 CD206, suggesting this is not a definitive indication of differentiation (Yu et al., 2016). The  
157 activation markers CD25 and CD86 were present on five monocyte clusters (Farina et al., 2004).  
158 Thus, monocyte/macrophages in the nose mainly consisted of classical monocytes with limited  
159 differentiation into macrophages.

#### 160 **Characterization of nasal CD4<sup>+</sup> memory T cells**

161 CD4<sup>+</sup> T memory cells, in particular Th17 cells, were previously found to be critical for Spn immunity  
162 in mice models of nasal colonisation (Lu et al., 2008; Zhang et al., 2009). Of all cells in the CD4<sup>+</sup> T  
163 cell lineage, 89.6% expressed the memory marker CD45RO. Of these, 60.3% expressed CD161, a  
164 marker that has been proposed to identify Th17 cells (Cosmi et al., 2008; Kleinschek et al., 2009).  
165 Another 4.6% of memory cells was defined by expression of high levels of CD25, a marker for  
166 regulatory T cells. We defined twenty-three clusters of CD161<sup>-</sup> CD4<sup>+</sup> T memory cells, twenty-one  
167 clusters of CD161<sup>+</sup> CD4<sup>+</sup> T memory cells and nine clusters of CD25<sup>hi</sup> CD4<sup>+</sup> T memory cells  
168 (Supplementary Fig. 5). All CD4<sup>+</sup> T memory cell clusters expressed a combination of the markers  
169 CD7, CD127, HLA-DR, CD38 and CD69 demonstrating a wide range in activation and  
170 differentiation status (Kumar et al., 2017). The CD25<sup>hi</sup> CD4<sup>+</sup> T memory cells likely were regulatory  
171 T cells as they were predominantly negative for CD127 and two of these clusters expressed



172 cytotoxic T-lymphocyte-associated protein 4 (CTLA-4) and CD27 (Ballke et al., 2016). CD161 was  
173 not restricted to Th17 cells as among CD161<sup>+</sup> CD4<sup>+</sup> T memory cells, two clusters expressed also  
174 CD8 and were thus double-positive T cells (Overgaard et al., 2015). In addition, two clusters  
175 expressed CD25 without CD127 expression indicating regulatory T cells, and one cluster  
176 expressed chemoattractant receptor-homologous molecule expressed on Th2 cells (CRTH2), a  
177 marker of Th2 cells (Cosmi et al., 2000).

## 178 **Cellular distribution through the nasal mucosa**

179 We then performed immunohistochemistry on a biopsy from a carriage<sup>-</sup> subject to  
180 further understand the distribution of these cells through the mucosal tissue (Fig. 6). CD4<sup>+</sup> T cells  
181 were found predominantly in the subepithelial layer (Fig. 6C,D), while CD8 and CD161 were also  
182 found at the epithelial layer (Fig. 6E,F). Similar to CD4<sup>+</sup> T cells, B cells (defined by CD20) were  
183 mostly observed in the sub-epithelium, while myeloid cells (CD68) could be seen at both the  
184 epithelial and sub-epithelial layer (Fig. 6G,H). Neutrophils were found abundantly at the epithelial  
185 surface but also in the sub-epithelium (Fig. 6I,J).

## 186 **Discussion**

187 This study comprehensively characterised immune cells in biopsies collected from the human  
188 nasal mucosa. As nasal samples were collected ten days following experimental human  
189 pneumococcal challenge, we were able to associate the frequency of specific immune populations  
190 with Spn carriage. Given the difficulty in access to such tissue samples, especially in a setting  
191 where the onset of infection is known, this provided a unique opportunity to investigate mucosal  
192 immune responses not undertaken previously. The application of CyTOF led to a broad and  
193 comprehensive study of cellular subsets involved in immunity against Spn carriage, deriving 293  
194 immune clusters belonging to nine cellular lineages. Clusters belonging to B cells and CD8<sup>+</sup>  
195 CD161<sup>+</sup> T cells were higher in carriage<sup>-</sup> subjects.

196 B cells were depleted from the nasal mucosa following the establishment of Spn carriage. This  
197 depletion correlated on an individual level with increased numbers of circulating 6B polysaccharide  
198 specific and total plasmablasts. Thus, this depletion likely was due to recirculation of activated B  
199 cells rather than due to apoptosis of nasal B cell upon Spn polysaccharide capsule encounter as  
200 has also been described (Dullforce et al., 1998). The total plasmablast expansion, but not 6B  
201 plasmablast expansion, was characterized by a decreased proportion of CCR10<sup>+</sup> cells, suggesting  
202 a preferential expansion of CCR10<sup>-</sup> cells or a downregulation of this marker. The correlation  
203 between low numbers of cells in specific nasal B cell clusters with increased levels of circulating  
204 plasmablasts indicates that activation of nasal B cells during carriage led to B cell re-circulation.  
205 Indeed, trafficking of memory B cells between airways and blood has been reported (Ohm-Laursen  
206 et al., 2018).

207 As B cells express the innate receptors TLR2 and TLR4 (Hayashi et al., 2005), which can be  
208 activated by pneumococcus, it is possible that carriage leads to non-specific B cell activation. This  
209 in turn could lead to increased protection against unrelated pathogens following pneumococcal  
210 carriage by boosting humoral responses. Indeed, levels of serum IgG against *Haemophilus*  
211 *influenzae* increased following colonization with Spn. We observed no increase in serum IgG levels  
212 against *Streptococcus pyogenes* or *Staphylococcus aureus*. It is possible that a limited number of  
213 pre-existing nasal B cells against these bacteria were present in the nose of these individuals at  
214 the time of colonization as their previous colonization history, and longevity of mucosal B cells, are  
215 unknown. It is also not impossible that the whole cell ELISA used here was unable to detect an  
216 increase against specific bacterial antigens. Negative associations between colonisation with Spn  
217 and *Haemophilus influenza* have been frequently reported and these are thought to rely on direct  
218 bactericidal effects of bacteria, competition for host nutrients and adherence factors, or activation  
219 of innate immune responses (de Steenhuijsen Piters et al., 2015). Our results suggest that non-  
220 specific activation of B cells could be another mechanism by which species within the microbiota  
221 interact with each other indirectly. *Neisseria lactamica* has been previously demonstrated to be

222 able to aspecifically activate innate B cells, suggesting this is not a unique feature of Spn  
223 (Vaughan et al., 2010; Vaughan et al., 2009)

224 Several nasal CD8<sup>+</sup> Trm cell clusters were higher in subjects protected from Spn carriage. These  
225 cells were previously found to be protective against influenza infection in murine models (Pizzolla  
226 et al., 2017). Spn is classically thought of as an extracellular bacterium and therefore the role of  
227 CD8<sup>+</sup> T cells in controlling Spn has not been extensively studied in humans. However, it was  
228 recently shown that Spn can replicate within splenic macrophages and can reside within epithelial  
229 cells, suggesting that CD8<sup>+</sup> T cell immunity could be elicited by Spn and play a role in protection  
230 against Spn carriage or disease (Ercoli et al., 2018; Weight et al., 2018). Indeed, Spn protein  
231 specific CD8<sup>+</sup> T cells could be readily detected in blood of Gambian adults (Mureithi et al., 2009).  
232 In murine models, depletion of CD8<sup>+</sup> T cells was protective against Spn lung infection but did not  
233 have an effect on nasopharyngeal carriage (Malley et al., 2005; Weber et al., 2011).

234 We found here that CD8<sup>+</sup> MAIT cell functionality before pneumococcal challenge associated with a  
235 resistance to carriage acquisition. MAIT cells are a recently identified T cell subset that is common  
236 in humans, consisting of up to 10% of all T cells in the circulation, but that is very rare in mice  
237 (Wakao et al., 2017). It is possible that this difference has led to an underappreciation of the CD8<sup>+</sup>  
238 T cell's role in protection against pneumococcal carriage in humans. MAIT cells were recently  
239 reported to be able to recognize Spn through MHC class I-related protein 1 (MR-1) dependent and  
240 independent pathways (Kurioka et al., 2018). MAIT cells were previously found to be important in  
241 the protection against lung bacterial and viral infections via direct and indirect responses (Wakao  
242 et al., 2017). Our findings now suggest these cells could also protect against nasopharyngeal Spn  
243 colonisation. Baseline MAIT functionality in blood positively correlated with cell numbers within one  
244 of the nasal CD8<sup>+</sup> CD161<sup>+</sup> cell clusters, suggesting trafficking of MAIT cells from the blood to the  
245 nose upon pneumococcal encounter. Indeed, MAIT cells have been shown to be depleted from the  
246 circulation and accumulate in tissues upon infection (Chen et al., 2017; Howson et al., 2018).

247 One limitation of this study is that the number of granulocytes measured was very low due to the  
248 overnight resting step following enzymatic digestion. While this resting step allowed for the return  
249 of markers that were cleaved by the enzymatic digestion, neutrophils quickly become apoptotic  
250 after being removed from the body (Autengruber et al., 2012; Goodyear et al., 2014; Pongracz et  
251 al., 1999). Consequently, the characterization of granulocytes reported here is incomplete and we  
252 were not able to assess whether specific neutrophil subsets are associated with protection against  
253 pneumococcal colonisation. In addition, due to the invasiveness of sample acquisition, sample size  
254 was limited and we were not able to characterize nasal biopsies at various time points. Thus, no  
255 baseline was available and transient responses early after bacterial inoculation could not be  
256 assessed. As subjects received antibiotics prior to biopsy collection, we were unable to associate  
257 levels of any of the monocyte or CD4<sup>+</sup> T cell clusters with Spn clearance.

258 In conclusion, this study provides both a broad and an in-depth view of the adult human nasal  
259 immune system in the setting of experimental human pneumococcal challenge. Nasal B cells were  
260 depleted following carriage establishment, likely due to recirculation following non-specific and  
261 specific activation. This associated with increases in antibody responses against not only Spn, but  
262 also *Haemophilus influenzae*. In addition, CD8<sup>+</sup> MAIT cell responses were associated with  
263 protection from Spn carriage.

## 264 **Acknowledgements**

265 This work was supported by the Medical Research Council (grant MR/M011569/1) to SG, and by  
266 support from Bill and Melinda Gates Foundation (grant OPP1117728) and the National Institute for  
267 Health Research (NIHR) Local Comprehensive Research Network to DF. This work was supported  
268 by the Human Infection Challenge Network for Vaccine Development (HIC-Vac) funded by the  
269 GCRF Networks in Vaccines Research and Development which was co-funded by the MRC and  
270 BBSRC. RSH and CW are funded through the NIHR Global Health Research Unit on Mucosal  
271 Pathogens at UCL. Flow cytometric acquisition was performed on a BD LSR II funded by a  
272 Wellcome Trust Multi-User Equipment Grant (104936/Z/14/Z). Purified pneumococcal Pneumolysin

273 derivative b (Pdb) protein was a kind gift by Dr. Eliane Miyaji. We would like to thank all volunteers  
274 for participating in this study and C. Lowe, C. Hales, H. Adler, V. Connor, C.J. Webb and A.  
275 Panarese for clinical support.

## 276 **Author contributions**

277 SJ contributed to conceiving, designing, conducting and analysing experiments, design of the  
278 study and writing of the paper. KR, CS, AV contributed to designing, conducting and analysing  
279 experiments. SG, LL, JRylance, AC, SL contributed to conceiving and designing the study. EM,  
280 EN, BC, AS, SP, EG, JReine, CW and PD contributed to conducting and analysing experiments.  
281 HH, RR, AHW, SL and MW contributed to sample collection. RSH, HS, BU and MY contributed to  
282 designing and analysing experiments. DF contributed to conceiving, designing and analysing  
283 experiments, design of the study and writing of the paper. All authors have read and approved the  
284 manuscript.

## 285 **Declaration of Interests**

286 The authors declare no competing interests.

## 287 **STAR Methods**

### 288 **Study design and sample collection**

289 Healthy adult subjects were screened for the presence of natural pneumococcal carriage in nasal  
290 wash samples (NW) using classical microbiology (Ferreira et al., 2013; Gritzfeld et al., 2014;  
291 Gritzfeld et al., 2013). Subjects not naturally carrying pneumococcus were then inoculated with  
292 80,000 CFU per nostril of 6B type Spn as described (Ferreira et al., 2013; Gritzfeld et al., 2013).  
293 Development of nasal carriage was monitored using NW samples collected at days 2 and 7 post  
294 inoculation. Growth of pneumococcus from NW samples at any time-point defined carriage positive  
295 volunteers. All subjects then received a three-day course of amoxicillin and underwent a 4mm  
296 nasal biopsy at day 10 post inoculation. The nasal cavity was first sprayed up to six times with

297 lidocaine hydrochloride 5% with phenylephrine hydrochloride 0.5%. Five to ten minutes later the  
298 infero-medial part of the inferior turbinate, i.e. the point of incision, was injected with up to 1 mL of  
299 lidocaine hydrochloride 2% with adrenaline 1:80 000. An incision of approximately 5 mm with  
300 No.15 blade was then made and 2-4 mm of mucosal tissue was removed with Tillies Henckle's  
301 surgical forceps. This study was registered under ISRCTN85509051. Nasal currettes (ASL Rhino-  
302 Pro®, Arlington Scientific) were collected from a second cohort (ISRCTN16993271) of inoculated  
303 subjects as previously described. The outcomes reported in this manuscript were a priori included  
304 in the study protocols.

### 305 **Ethics statement**

306 All subjects gave written informed consent and research was conducted in compliance with all  
307 relevant ethical regulations. Ethical approval was given by the East Liverpool NHS Research and  
308 Ethics Committee (REC), reference numbers: 17/NW/0029 and 14/NW/1460.

### 309 **Nasal biopsy digestion**

310 Nasal biopsies were finely cut using a sterile scalpel size 11 (Fisher Scientific). Pieces were then  
311 incubated in 20mL pre-warmed RPMI 1640 (Fisher Scientific) with Liberase TL (250µg/mL, Sigma)  
312 and DNase I (50µg/mL, Sigma). Fragments were incubated for 45 minutes at 37°C, while shaking  
313 at 250rpm at a 10° angle. At the end of the digestion, biopsies were passed five times through a  
314 16-gauge blunt-ended needle (Fisher Scientific) and the digested sample was filtered over a 70µm  
315 filter (Fisher Scientific). This process was repeated for any remaining fragments. Cells were spun  
316 down for 10 minutes at 400xg and then red blood cells were lysed using an osmotic lysis buffer.  
317 Cells were washed with RPMI with 20% heat-inactivated fetal bovine serum (FBS, Fisher  
318 Scientific), resuspended at 10<sup>6</sup> cells/mL in RPMI with 20% FBS and rested overnight. The next  
319 day, cells were counted and washed with RPMI + 10% FBS. Cells were stained as a viability  
320 marker using 1µM intercalator Rh-103 (Fluidigm) for 15 minutes, washed and fixed with 1.8%

321 paraformaldehyde (Sigma) for 15 minutes. Cells were washed and stored in liquid nitrogen in CTL-  
322 Cryo™ ABC media (Cellular Technology Limited) until CyTOF barcoding and staining.

### 323 **Mass cytometry staining and analysis**

324 Nasal biopsy cells were thawed on ice and barcoded using the Cell-ID 20-plex Pd Barcoding Kit as  
325 per manufacturer's instructions (Fluidigm). The effect of fixation on epitopes detected by the  
326 included antibody clones was tested using PBMCs and monocyte-derived dendritic cells. Following  
327 three washes with staining buffer (Fluidigm) and 10 minutes of FcR blocking (Biolegend) pooled  
328 cells were stained for 45 minutes at room temperature with the antibody cocktail (Supplementary  
329 Table 1). Cells were washed twice with staining buffer and incubated for 1 hour with 1000x diluted  
330 125 µM Cell-ID intercalator-Ir (Fluidigm) to stain DNA. Cells were washed 3 times with staining  
331 buffer and 2 times with de-ionized H<sub>2</sub>O prior to addition of normalization beads (Fluidigm) and  
332 acquisition on a Helios 2 mass cytometer (DVS Sciences). CyTOF Fcs files were normalized using  
333 the included beads, concatenated and debarcoded as per manufacturer's instructions. The  
334 debarcoding step leads to a removal of doublets (Zunder et al., 2015). Then, viable immune cells  
335 were pre-gated (Fig. 2) and exported as .fcs files using Flowjo X (Treestar). These were further  
336 analysed using Cytosplore (<https://www.cytosplore.org/>).

### 337 **Nasal B cell phenotyping**

338 Immunophenotyping of nasal B cells obtained by currettes was performed as described (Jochems  
339 et al., 2017). In brief, cells were dislodged from currettes and stained with LIVE/DEAD® Fixable  
340 Aqua Dead Cell Stain (ThermoFisher) and an antibody cocktail containing among others Epcam-  
341 PE, HLADR-PECy7, CD66b-FITC, CD19-BV650 (all Biolegend), CD3-APCCy7, CD14-PercpCy5.5  
342 (BD Biosciences) and CD45-PACOrange (ThermoFisher). Samples were acquired on a LSRII flow  
343 cytometer and analysed using Flowjo X (Treestar). Fluorescent minus one controls for each of the  
344 included antibodies were used to validate results during set-up of all of the panels used. Samples  
345 with less than 500 immune cells or 250 epithelial cells (13.3% of all nasal samples) were excluded  
346 from further analysis.

### 347 **Intracellular cytokine staining following PMA/Ionomycin or pneumococcus stimulation**

348 For intracellular cytokine staining after PMA and Ionomycin stimulation, fresh nasal biopsy cells or  
349 PBMC were stimulated with 100 and 500 ng/mL of these, respectively. After 2 hours, Golgiplug™  
350 (BD Biosciences) was added and cells were incubated for another 16 hours. Cells were washed  
351 and stained extracellularly with LIVE/DEAD® Fixable Violet Dead Cell Stain (ThermoFisher) for 15  
352 minutes and then for another 15 minutes with CD161-APC, CD69-BV650, CD25-PEDazzle594,  
353 CD103-BV605, CD4-PercpCy5.5, CD8-AF700, TCRvα7.2-BV785 (all Biolegend) and CD3-APH7  
354 and TCRgd-PECy7 (BD Biosciences). Cells were then permeabilized using the eBioscience™  
355 Foxp3 / Transcription Factor Staining Buffer Set (Fisher Scientific) following the manufacturer's  
356 protocol. Intracellular staining was done for 30 minutes with FOXP3-AF488, IFNγ-PE, TNFα-  
357 BV711 (Biolegend) and IL17A-BV510 (BD Biosciences). Finally, cells were washed, resuspended  
358 in 200μL PBS and acquired on a LSR2.

359 For staining with pneumococcus, PBMC were thawed with 50μg/mL DNase I (Sigma) in pre-  
360 warmed RPMI + 10% FBS and washed twice, once in media including DNase I and once in media  
361 without DNase I. Cells were rested overnight and then cultured at  $5 \times 10^5$  cells in 500uL media with  
362 5ug/mL (corresponding to  $4.3 \times 10^7$  CFU/mL) heat-inactivated type 6B *Streptococcus pneumoniae*  
363 or left unstimulated as a control. After 48 hours, fresh antigen was added to the cells and 2 hours  
364 later Golgiplug was added and cells were treated as above.

### 365 **Pneumococcal-specific B cell detection**

366 Purified pneumococcal polysaccharides 6B and 15B (Oxford Biosystems) and Pdb were diluted to  
367 100μg/mL in purified H<sub>2</sub>O and biotinylated using the One-Step Antibody Biotinylation Kit (Miltenyi)  
368 as per manufacturer's instructions. Biotinylated proteins were then 2x dialysed for 45 minutes  
369 against 1L PBS using Slide-A-Lyzer™ MINI Dialysis Device, 3500 molecular weight cut off  
370 (ThermoFisher) and stored at 4°C until labelling. Biotinylated 15B, 6B and Pdb were then mixed in  
371 a 4:1 molecular ratio (Pdb), or a 1:1 molecular ratio (polysaccharides), with PE-streptavidin,



372 BV785-streptavidin or FITC-streptavidin (Biolegend), respectively. Incubation was performed on  
373 ice in a stepwise approach where 1/10 fraction of streptavidin conjugate was added to the antigen  
374 followed by a ten-minute incubation. After the final incubation, 1 pmol free biotin was added and  
375 the mixture was incubated for 30 minutes on ice. Labelled antigens were stored at 4°C and used  
376 within two weeks.

377 To stain cells, PBMC were thawed with 50µg/mL DNase I (Sigma) in pre-warmed RPMI + 10%  
378 FBS and washed once in media including DNase I. Cells were then resuspended in PBS  
379 containing LIVE/DEAD® Fixable Violet Dead Cell Stain (ThermoFisher) with 10µg/mL purified  
380 streptavidin (to block aspecific binding, Biolegend) for 15 minutes. Then labelled antigens and an  
381 antibody cocktail containing CD71-AF700, CD19-BV605, CD27-PE/Cy7, CD38-APC/Cy7, CD69-  
382 BV510 and CCR10-APC (all Biolegend) was added and cells were incubated for another 15  
383 minutes. Finally, cells were washed, resuspended in 200µL PBS and acquired on a LSR2.

#### 384 **Immunohistochemistry**

385 A nasal biopsy was fixed in 4% PFA for 16-24 hours before rinsing in 50% and 70% ethanol. This  
386 was embedded in Paraffin, cut into 4µm sections, dewaxed, subjected to antigen retrieval (95°C for  
387 15 minutes in Sodium Citrate Buffer (pH 6) and processed for immunohistochemistry as published  
388 (Durrenberger et al., 2012). In short, sections were permeabilised in methanol for 15 minutes with  
389 1% hydrogen peroxide. After rinsing in PBS, primary antibodies were diluted in goat (or horse)  
390 serum buffer (1% BSA, 4% goat (or horse) serum, 0.01% sodium azide in PBS). Primary  
391 antibodies used were: CD3 (Dako), CD4, CD20, CD66b, CD68, CD11b (Abcam), CD8 (Epitomics)  
392 and CD161 (Atlas antibodies), which were applied over night at 4°C. Sections were rinsed in PBS  
393 and secondary biotinylated antibodies (Vector lab) were applied for 45 mins at RT. Slides were  
394 rinsed and a complex of avidin and biotin (ABC) solution was added to sections for 60 minutes  
395 which was prepared 30 minutes prior incubation After rinsing, NovaRed™ (Vector®, Burlingame,  
396 CA, U.S.A) chromogen was prepared to manufacturer's instructions. Sections were counterstained,  
397 dehydrated, placed in xylene and mounted for microscopy and scanned using the nanozoomer

398 digital pathology (NDP, Hamamatsu, Photonics KK). Pictures were processed using the NDPview  
399 2 software (version 2.6.13; Hamamatsu Photonics KK).

#### 400 **ELISA**

401 Serum IgG and IgA titres against *Streptococcus pneumoniae*, *Streptococcus pyogenes*,  
402 *Staphylococcus aureus* and *Haemophilus influenzae* were quantified in serum samples using  
403 whole cell ELISA. The ELISA was performed on MaxiSorp™ 96 well plates (Nunc). Per pathogen,  
404 100µL of 10<sup>8</sup> CFU/mL was prepared in carbonate buffer pH 8, added to the plates and allowed to  
405 adhere to the wells for 16 hours at 22°C. Then the plates were washed three times using  
406 phosphate buffered saline (PBS) containing 0.05% Tween 20, followed by blocking by adding 100  
407 µL of PBS containing 2% Bovine serum albumin. Plates were incubated at 37°C for 1 hour and  
408 were washed before adding serial dilutions of serum samples. Standard curves for IgG and IgA  
409 were generated based on a standard pool serum (sera of 7 Spn carriers collected at D23 post  
410 challenge). Arbitrary units of IgG and IgA were assigned to the serum standard for each pathogen.

#### 411 **Statistical analysis**

412 Two-tailed, non-parametric statistical tests were used throughout the study. The number of cells in  
413 a cluster for each subject was normalized against the total number of non-immune cells acquired  
414 by CyTOF for that subject to account for number of cells isolated from a given biopsy. This  
415 normalization strategy has the advantage that the normalized frequencies of cells in a cluster is not  
416 dependent on other clusters, which is a major disadvantage of normalizing against total immune  
417 cells. Normalized cluster abundances were then compared between carriage<sup>-</sup> and carriage<sup>+</sup>  
418 subjects for each of the clusters using the Mann-Whitney test, without correcting for multiple  
419 testing. Data was analysed and graphs were created using 'pheatmap' and 'ggplot2' packages in R  
420 software and circular graph (Fig. 1C) was created using circos software (Krzywinski et al., 2009).

#### 421 **Data availability**

422 Normalized and debarcoded CyTOF fcs files have been deposited in the FlowRepository

423 (<https://flowrepository.org/>).

424

## 425 **References**

- 426 Abdelmoula, W.M., Pezzotti, N., Holt, T., Dijkstra, J., Vilanova, A., McDonnell, L.A., and Lelieveldt,  
427 B.P.F. (2018). Interactive Visual Exploration of 3D Mass Spectrometry Imaging Data Using  
428 Hierarchical Stochastic Neighbor Embedding Reveals Spatiomolecular Structures at Full Data  
429 Resolution. *J Proteome Res* 17, 1054-1064.
- 430 Autengruber, A., Gereke, M., Hansen, G., Hennig, C., and Bruder, D. (2012). Impact of enzymatic  
431 tissue disintegration on the level of surface molecule expression and immune cell function. *Eur J*  
432 *Microbiol Immunol (Bp)* 2, 112-120.
- 433 Ballke, C., Gran, E., Baekkevold, E.S., and Jahnsen, F.L. (2016). Characterization of Regulatory T-  
434 Cell Markers in CD4+ T Cells of the Upper Airway Mucosa. *PLoS One* 11, e0148826.
- 435 Chen, Z., Wang, H., D'Souza, C., Sun, S., Kostenko, L., Eckle, S.B., Meehan, B.S., Jackson, D.C.,  
436 Strugnell, R.A., Cao, H., *et al.* (2017). Mucosal-associated invariant T-cell activation and  
437 accumulation after in vivo infection depends on microbial riboflavin synthesis and co-stimulatory  
438 signals. *Mucosal Immunol* 10, 58-68.
- 439 Cosmi, L., Annunziato, F., Galli, M.I.G., Maggi, R.M.E., Nagata, K., and Romagnani, S. (2000).  
440 CRTH2 is the most reliable marker for the detection of circulating human type 2 Th and type 2 T  
441 cytotoxic cells in health and disease. *Eur J Immunol* 30, 2972-2979.
- 442 Cosmi, L., De Palma, R., Santarasci, V., Maggi, L., Capone, M., Frosali, F., Rodolico, G., Querci,  
443 V., Abbate, G., Angeli, R., *et al.* (2008). Human interleukin 17-producing cells originate from a  
444 CD161+CD4+ T cell precursor. *J Exp Med* 205, 1903-1916.
- 445 de Steenhuijsen Piters, W.A., Sanders, E.A., and Bogaert, D. (2015). The role of the local  
446 microbial ecosystem in respiratory health and disease. *Philos Trans R Soc Lond B Biol Sci* 370.
- 447 Dullforce, P., Sutton, D.C., and Heath, A.W. (1998). Enhancement of T cell-independent immune  
448 responses in vivo by CD40 antibodies. *Nat Med* 4, 88-91.
- 449 Durrenberger, P.F., Ettore, A., Kamel, F., Webb, L.V., Sim, M., Nicholas, R.S., Malik, O.,  
450 Reynolds, R., Boyton, R.J., and Altmann, D.M. (2012). Innate immunity in multiple sclerosis white  
451 matter lesions: expression of natural cytotoxicity triggering receptor 1 (NCR1). *J*  
452 *Neuroinflammation* 9, 1.
- 453 Ercoli, G., Fernandes, V.E., Chung, W.Y., Wanford, J.J., Thomson, S., Bayliss, C.D., Straatman,  
454 K., Crocker, P.R., Dennison, A., Martinez-Pomares, L., *et al.* (2018). Intracellular replication of  
455 *Streptococcus pneumoniae* inside splenic macrophages serves as a reservoir for septicaemia. *Nat*  
456 *Microbiol* 3, 600-610.
- 457 Farina, C., Theil, D., Semlinger, B., Hohfeld, R., and Meinl, E. (2004). Distinct responses of  
458 monocytes to Toll-like receptor ligands and inflammatory cytokines. *Int Immunol* 16, 799-809.

459 Ferreira, D.M., Neill, D.R., Bangert, M., Gritzfeld, J.F., Green, N., Wright, A.K., Pennington, S.H.,  
460 Bricio-Moreno, L., Moreno, A.T., Miyaji, E.N., *et al.* (2013). Controlled human infection and  
461 rechallenge with *Streptococcus pneumoniae* reveals the protective efficacy of carriage in healthy  
462 adults. *Am J Respir Crit Care Med* 187, 855-864.

463 Goldblatt, D., Hussain, M., Andrews, N., Ashton, L., Virta, C., Melegaro, A., Pebody, R., George,  
464 R., Soininen, A., Edmunds, J., *et al.* (2005). Antibody Responses to Nasopharyngeal Carriage of  
465 *Streptococcus pneumoniae* in Adults: A Longitudinal Household Study. *Journal of Infectious*  
466 *Diseases* 192, 387-393.

467 Goodyear, A.W., Kumar, A., Dow, S., and Ryan, E.P. (2014). Optimization of murine small  
468 intestine leukocyte isolation for global immune phenotype analysis. *J Immunol Methods* 405, 97-  
469 108.

470 Gritzfeld, J.F., Cremers, A.J., Ferwerda, G., Ferreira, D.M., Kadioglu, A., Hermans, P.W., and  
471 Gordon, S.B. (2014). Density and duration of experimental human pneumococcal carriage. *Clin*  
472 *Microbiol Infect* 20, O1145-1151.

473 Gritzfeld, J.F., Wright, A.D., Collins, A.M., Pennington, S.H., Wright, A.K., Kadioglu, A., Ferreira,  
474 D.M., and Gordon, S.B. (2013). Experimental human pneumococcal carriage. *J Vis Exp*.

475 Hardy, R.R. (2006). B-1 B cell development. *J Immunol* 177, 2749-2754.

476 Hayashi, E.A., Akira, S., and Nobrega, A. (2005). Role of TLR in B cell development: signaling  
477 through TLR4 promotes B cell maturation and is inhibited by TLR2. *J Immunol* 174, 6639-6647.

478 Holtt, T., Pezzotti, N., van Unen, V., Koning, F., Eisemann, E., Lelieveldt, B., and Vilanova, A.  
479 (2016). Cytosplore: Interactive Immune Cell Phenotyping for Large Single-Cell Datasets. *Comput*  
480 *Graph Forum* 35, 171-180.

481 Howson, L.J., Napolitani, G., Shepherd, D., Ghadbane, H., Kurupati, P., Preciado-Llanes, L., Rei,  
482 M., Dobinson, H.C., Gibani, M.M., Teng, K.W.W., *et al.* (2018). MAIT cell clonal expansion and  
483 TCR repertoire shaping in human volunteers challenged with *Salmonella Paratyphi A*. *Nat*  
484 *Commun* 9, 253.

485 Jochems, S.P., Marcon, F., Carniel, B.F., Holloway, M., Mitsi, E., Smith, E., Gritzfeld, J.F.,  
486 Solorzano, C., Reine, J., Pojar, S., *et al.* (2018). Inflammation induced by influenza virus impairs  
487 human innate immune control of pneumococcus. *Nat Immunol*.

488 Jochems, S.P., Piddock, K., Rylance, J., Adler, H., Carniel, B.F., Collins, A., Gritzfeld, J.F.,  
489 Hancock, C., Hill, H., Reine, J., *et al.* (2017). Novel Analysis of Immune Cells from Nasal  
490 Microbiopsy Demonstrates Reliable, Reproducible Data for Immune Populations, and Superior  
491 Cytokine Detection Compared to Nasal Wash. *PLoS One* 12, e0169805.

492 Jourdan, M., Caraux, A., Caron, G., Robert, N., Fiol, G., Reme, T., Bollore, K., Vendrell, J.P., Le  
493 Gallou, S., Mourcin, F., *et al.* (2011). Characterization of a transitional preplasmablast population in  
494 the process of human B cell to plasma cell differentiation. *J Immunol* 187, 3931-3941.

495 Kaku, Y., Imaoka, H., Morimatsu, Y., Komohara, Y., Ohnishi, K., Oda, H., Takenaka, S., Matsuoka,  
496 M., Kawayama, T., Takeya, M., *et al.* (2014). Overexpression of CD163, CD204 and CD206 on  
497 alveolar macrophages in the lungs of patients with severe chronic obstructive pulmonary disease.  
498 *PLoS One* 9, e87400.

499 Kato, A., Hulse, K.E., Tan, B.K., and Schleimer, R.P. (2013). B-lymphocyte lineage cells and the  
500 respiratory system. *J Allergy Clin Immunol* 131, 933-957; quiz 958.

501 Khan, M.N., and Pichichero, M.E. (2014). The host immune dynamics of pneumococcal  
502 colonization: implications for novel vaccine development. *Human vaccines & immunotherapeutics*  
503 10, 3688-3699.

504 Kleinschek, M.A., Boniface, K., Sadekova, S., Grein, J., Murphy, E.E., Turner, S.P., Raskin, L.,  
505 Desai, B., Faubion, W.A., de Waal Malefyt, R., *et al.* (2009). Circulating and gut-resident human  
506 Th17 cells express CD161 and promote intestinal inflammation. *J Exp Med* 206, 525-534.

507 Krzywinski, M., Schein, J., Birol, I., Connors, J., Gascoyne, R., Horsman, D., Jones, S.J., and  
508 Marra, M.A. (2009). Circos: an information aesthetic for comparative genomics. *Genome Res* 19,  
509 1639-1645.

510 Kumar, B.V., Ma, W., Miron, M., Granot, T., Guyer, R.S., Carpenter, D.J., Senda, T., Sun, X., Ho,  
511 S.H., Lerner, H., *et al.* (2017). Human Tissue-Resident Memory T Cells Are Defined by Core  
512 Transcriptional and Functional Signatures in Lymphoid and Mucosal Sites. *Cell Rep* 20, 2921-  
513 2934.

514 Kurioka, A., van Wilgenburg, B., Javan, R.R., Hoyle, R., van Tonder, A.J., Harrold, C.L., Leng, T.,  
515 Howson, L.J., Shepherd, D., Cerundolo, V., *et al.* (2018). Diverse *Streptococcus pneumoniae*  
516 Strains Drive a Mucosal-Associated Invariant T-Cell Response Through Major Histocompatibility  
517 Complex class I-Related Molecule-Dependent and Cytokine-Driven Pathways. *J Infect Dis* 217,  
518 988-999.

519 Lu, Y.J., Gross, J., Bogaert, D., Finn, A., Bagrade, L., Zhang, Q., Kolls, J.K., Srivastava, A.,  
520 Lundgren, A., Forte, S., *et al.* (2008). Interleukin-17A mediates acquired immunity to  
521 pneumococcal colonization. *PLoS Pathog* 4, e1000159.

522 Lu, Y.J., Leite, L., Goncalves, V.M., Dias Wde, O., Liberman, C., Fratelli, F., Alderson, M., Tate, A.,  
523 Maisonneuve, J.F., Robertson, G., *et al.* (2010). GMP-grade pneumococcal whole-cell vaccine  
524 injected subcutaneously protects mice from nasopharyngeal colonization and fatal aspiration-  
525 sepsis. *Vaccine* 28, 7468-7475.

526 Malley, R., Trzcinski, K., Srivastava, A., Thompson, C.M., Anderson, P.W., and Lipsitch, M. (2005).  
527 CD4+ T cells mediate antibody-independent acquired immunity to pneumococcal colonization.  
528 *Proceedings of the National Academy of Sciences of the United States of America* 102, 4848-  
529 4853.

530 McCool, T.L., Cate, T.R., Moy, G., and Weiser, J.N. (2002). The immune response to  
531 pneumococcal proteins during experimental human carriage. *JExpMed* 195, 359.

532 Melegaro, A., Gay, N.J., and Medley, G.F. (2004). Estimating the transmission parameters of  
533 pneumococcal carriage in households. *Epidemiol Infect* 132, 433-441.

534 Morteau, O., Gerard, C., Lu, B., Ghiran, S., Rits, M., Fujiwara, Y., Law, Y., Distelhorst, K., Nielsen,  
535 E.M., Hill, E.D., *et al.* (2008). An indispensable role for the chemokine receptor CCR10 in IgA  
536 antibody-secreting cell accumulation. *J Immunol* 181, 6309-6315.

537 Mureithi, M.W., Finn, A., Ota, M.O., Zhang, Q., Davenport, V., Mitchell, T.J., Williams, N.A.,  
538 Adegbola, R.A., and Heyderman, R.S. (2009). T cell memory response to pneumococcal protein  
539 antigens in an area of high pneumococcal carriage and disease. *J Infect Dis* 200, 783-793.

540 O'Brien, K.L., Wolfson, L.J., Watt, J.P., Henkle, E., Deloria-Knoll, M., McCall, N., Lee, E.,  
541 Mulholland, K., Levine, O.S., Cherian, T., *et al.* (2009). Burden of disease caused by  
542 *Streptococcus pneumoniae* in children younger than 5 years: global estimates. *Lancet* 374, 893-  
543 902.

544 Ohm-Laursen, L., Meng, H., Chen, J., Zhou, J.Q., Corrigan, C.J., Gould, H.J., and Kleinstein, S.H.  
545 (2018). Local Clonal Diversification and Dissemination of B Lymphocytes in the Human Bronchial  
546 Mucosa. *Front Immunol* 9, 1976.

547 Overgaard, N.H., Jung, J.W., Steptoe, R.J., and Wells, J.W. (2015). CD4+/CD8+ double-positive T  
548 cells: more than just a developmental stage? *J Leukoc Biol* 97, 31-38.

549 Pennington, S.H., Pojar, S., Mitsi, E., Gritzfeld, J.F., Nikolaou, E., Solorzano, C., Owugha, J.T.,  
550 Masood, Q., Gordon, M.A., Wright, A.D., *et al.* (2016). Polysaccharide-specific Memory B-cells  
551 Predict Protection Against Experimental Human Pneumococcal Carriage. *Am J Respir Crit Care*  
552 *Med.*

553 Pizzolla, A., Nguyen, T.H.O., Smith, J.M., Brooks, A.G., Kedzieska, K., Heath, W.R., Reading,  
554 P.C., and Wakim, L.M. (2017). Resident memory CD8(+) T cells in the upper respiratory tract  
555 prevent pulmonary influenza virus infection. *Sci Immunol* 2.

556 Pongracz, J., Webb, P., Wang, K., Deacon, E., Lunn, O.J., and Lord, J.M. (1999). Spontaneous  
557 neutrophil apoptosis involves caspase 3-mediated activation of protein kinase C-delta. *J Biol Chem*  
558 274, 37329-37334.

559 Rylance, J., de Steenhuijsen Piters, W.A., Pojar, S., Nikolaou, E., German, E., Mitsi, E., Jochems,  
560 S., Carniel, B., Solórzano, C., Reiné, J., *et al.* (2018). Effect of Live Attenuated Influenza Vaccine  
561 on Pneumococcal Carriage. bioRxiv.

562 Simell, B., Auranen, K., Kayhty, H., Goldblatt, D., Dagan, R., O'Brien, K.L., and Pneumococcal  
563 Carriage, G. (2012). The fundamental link between pneumococcal carriage and disease. *Expert*  
564 *Rev Vaccines* 11, 841-855.

565 Trautmann, A., Ruckert, B., Schmid-Grendelmeier, P., Niederer, E., Brocker, E.B., Blaser, K., and  
566 Akdis, C.A. (2003). Human CD8 T cells of the peripheral blood contain a low CD8 expressing  
567 cytotoxic/effector subpopulation. *Immunology* 108, 305-312.

568 van Splunter, M., van Hoffen, E., Floris-Vollenbroek, E.G., Timmerman, H., de Bos, E.L., Meijer,  
569 B., Ulfman, L.H., Witteman, B., Wells, J.M., Brugman, S., *et al.* (2018). Oral cholera vaccination  
570 promotes homing of IgA(+) memory B cells to the large intestine and the respiratory tract. *Mucosal*  
571 *Immunol* 11, 1254-1264.

572 van Unen, V., Holtt, T., Pezzotti, N., Li, N., Reinders, M.J.T., Eisemann, E., Koning, F., Vilanova,  
573 A., and Lelieveldt, B.P.F. (2017). Visual analysis of mass cytometry data by hierarchical stochastic  
574 neighbour embedding reveals rare cell types. *Nature Communications* 8.

575 Vaughan, A.T., Brackenbury, L.S., Massari, P., Davenport, V., Gorringer, A., Heyderman, R.S., and  
576 Williams, N.A. (2010). *Neisseria lactamica* selectively induces mitogenic proliferation of the naive B  
577 cell pool via cell surface Ig. *J Immunol* 185, 3652-3660.

578 Vaughan, A.T., Gorringer, A., Davenport, V., Williams, N.A., and Heyderman, R.S. (2009). Absence  
579 of mucosal immunity in the human upper respiratory tract to the commensal bacteria *Neisseria*  
580 *lactamica* but not pathogenic *Neisseria meningitidis* during the peak age of nasopharyngeal  
581 carriage. *J Immunol* 182, 2231-2240.

582 Wakao, H., Sugimoto, C., Kimura, S., and Wakao, R. (2017). Mucosal-Associated Invariant T Cells  
583 in Regenerative Medicine. *Front Immunol* 8, 1711.

584 Weber, S.E., Tian, H., and Pirofski, L.A. (2011). CD8+ cells enhance resistance to pulmonary  
585 serotype 3 *Streptococcus pneumoniae* infection in mice. *J Immunol* 186, 432-442.

586 Weight, C.M., Venturini, C., Pojar, S., Jochems, S., Reiné, J., amp, uacutes, Nikolaou, E.,  
587 Solorzano, C., Anderson, C., *et al.* (2018). Epithelial control of colonisation by *Streptococcus*  
588 *pneumoniae* at the human mucosal surface. bioRxiv.

589 Welte, T., Torres, A., and Nathwani, D. (2012). Clinical and economic burden of community-  
590 acquired pneumonia among adults in Europe. *Thorax* 67, 71-79.

591 Yu, Y.R., Hotten, D.F., Malakhau, Y., Volker, E., Ghio, A.J., Noble, P.W., Kraft, M., Hollingsworth,  
592 J.W., Gunn, M.D., and Tighe, R.M. (2016). Flow Cytometric Analysis of Myeloid Cells in Human  
593 Blood, Bronchoalveolar Lavage, and Lung Tissues. *Am J Respir Cell Mol Biol* 54, 13-24.



594 Zhang, Z., Clarke, T.B., and Weiser, J.N. (2009). Cellular effectors mediating Th17-dependent  
595 clearance of pneumococcal colonization in mice. *J Clin Invest* 119, 1899-1909.  
596 Zunder, E.R., Finck, R., Behbehani, G.K., Amir el, A.D., Krishnaswamy, S., Gonzalez, V.D.,  
597 Lorang, C.G., Bjornson, Z., Spitzer, M.H., Bodenmiller, B., *et al.* (2015). Palladium-based mass tag  
598 cell barcoding with a doublet-filtering scheme and single-cell deconvolution algorithm. *Nat Protoc*  
599 10, 316-333.

600

601

## Tables

|                                                  | <b>Carriage<sup>-</sup></b><br><b>(n=12)</b> | <b>Carriage<sup>+</sup></b><br><b>(n=8)</b> | Table 1. |
|--------------------------------------------------|----------------------------------------------|---------------------------------------------|----------|
| <b>Female gender (%)</b>                         | 4 (33.3%)                                    | 4 (50%)                                     | Volume   |
| <b>Median age (min-max)</b>                      | 21 (18-44)                                   | 23 (20-30)                                  | ntee     |
| <b>Median day 2 Spn density CFU/mL (min-max)</b> | -                                            | 127.2 (5.8 - 38677.7)                       | r        |
| <b>Median day 7 Spn density CFU/mL (min-max)</b> | -                                            | 187.5 (0 – 21736.6)                         |          |

cohort characteristics divided by carriage state.

Table 2. List of lineages and subpopulations derived from nasal biopsy analysis. For all nine lineages and twenty-two subpopulations, the numbers of defined cell clusters are shown. In addition, the total numbers of cells within those lineages/subpopulations and the percentage of that subpopulation within all cells for carriage<sup>-</sup> and carriage<sup>+</sup> subjects are shown. Memory cells are defined as CD45RO<sup>+</sup>RA<sup>-</sup> and naïve cells are defined as CD45RO<sup>-</sup>RA<sup>+</sup>

| <b>Lineage</b>                 | <b>Subpopulation</b>                                   | <b>Clusters</b> | <b>Cells</b> | <b>%Carriage<sup>-</sup></b> | <b>%Carriage<sup>+</sup></b> |
|--------------------------------|--------------------------------------------------------|-----------------|--------------|------------------------------|------------------------------|
| <b>CD8<sup>+</sup> T cells</b> | CD161 <sup>+</sup> CD8 <sup>+</sup> T cells            | 17              | 25103        | 13.0                         | 11.7                         |
|                                | Naïve CD8 <sup>+</sup> T cells                         | 20              | 9042         | 3.8                          | 6.3                          |
|                                | Memory CD8 <sup>+</sup> T cells                        | 26              | 36860        | 18.1                         | 19.4                         |
|                                | <b>Total</b>                                           | <b>63</b>       | <b>71005</b> | <b>34.9</b>                  | <b>37.3</b>                  |
| <b>CD4<sup>+</sup> T cells</b> | CD161 <sup>+</sup> CD4 <sup>+</sup> T cells            | 21              | 36328        | 18.7                         | 17.0                         |
|                                | CD25 <sup>hi</sup> CD4 <sup>+</sup> T cells            | 9               | 2743         | 1.2                          | 1.9                          |
|                                | Naïve CD4 <sup>+</sup> T cells                         | 9               | 4235         | 2.2                          | 1.8                          |
|                                | Memory CD4 <sup>+</sup> T cells                        | 23              | 21158        | 10.5                         | 10.8                         |
|                                | CD45RO <sup>-</sup> RA <sup>-</sup> CD4 <sup>+</sup> T | 6               | 2743         | 1.2                          | 1.9                          |
|                                | <b>Total</b>                                           | <b>68</b>       | <b>67207</b> | <b>33.8</b>                  | <b>33.5</b>                  |
| <b>Myeloid cells</b>           | -                                                      | 25              | 15226        | 7.4                          | 8.3                          |
| <b>Innate lymphoid cells</b>   | CD8 <sup>-</sup> CD16 <sup>+</sup> ILC                 | 13              | 3683         | 2.0                          | 1.5                          |
|                                | CD8 <sup>+</sup> CD16 <sup>+</sup> ILC                 | 5               | 2392         | 1.1                          | 1.4                          |

|                                               |                                          |            |               |            |            |
|-----------------------------------------------|------------------------------------------|------------|---------------|------------|------------|
|                                               | CD16 <sup>-</sup> CD127 <sup>+</sup> ILC | 4          | 1550          | 0.8        | 0.6        |
|                                               | CD16 <sup>-</sup> CD127 <sup>-</sup> ILC | 9          | 3417          | 1.7        | 1.8        |
|                                               | <b>Total</b>                             | <b>31</b>  | <b>11042</b>  | <b>5.6</b> | <b>5.3</b> |
| <b>B cells</b>                                | -                                        | 22         | 10279         | 5.8        | 3.7        |
| <b>CD4<sup>-</sup>CD8<sup>-</sup> T cells</b> | TCRgd T cells                            | 9          | 1838          | 0.8        | 1.2        |
|                                               | DN T cells                               | 7          | 3052          | 1.6        | 1.5        |
|                                               | CD8 <sup>dim</sup> T cells               | 13         | 4317          | 2.2        | 2.1        |
|                                               | <b>Total</b>                             | <b>29</b>  | <b>9207</b>   | <b>4.6</b> | <b>4.7</b> |
| <b>Granulocytes</b>                           | CD66b <sup>+</sup> Granulocytes          | 19         | 5478          | 2.9        | 2.4        |
|                                               | CD66b <sup>-</sup> Granulocytes          | 2          | 662           | 0.3        | 0.3        |
|                                               | <b>Total</b>                             | <b>21</b>  | <b>6140</b>   | <b>3.2</b> | <b>2.7</b> |
| <b>CD117<sup>+</sup> cells</b>                | CD117 <sup>+</sup> lymphocytes           | 8          | 2566          | 1.3        | 1.3        |
|                                               | CD117 <sup>+</sup> mast cells            | 13         | 2810          | 1.5        | 1.2        |
|                                               | <b>Total</b>                             | <b>21</b>  | <b>5376</b>   | <b>8.5</b> | <b>6.2</b> |
| <b>Plasma cells</b>                           | -                                        | 13         | 3944          | 2.0        | 2.0        |
| <b>9</b>                                      | <b>22</b>                                | <b>293</b> | <b>199426</b> | <b>100</b> | <b>100</b> |



Subjects who acquired pneumococcus following challenge are depicted in red (n=8), while those protected are depicted in blue (n=12). Antibiotics (abx) were administered in the 3 days leading up to biopsy collection (blue area). B) Viable cell yield following enzymatic biopsy digestion for the twenty biopsies collected for CyTOF. Individual samples and boxplots are shown. C) Circle diagram showing all 293 defined clusters within 9 lineages and 22 subpopulations. From outside in: number of cells in each cluster is depicted by grey bars. Relative expression for 36 markers is shown with red depicting higher expression (CD45 and Epcam are not depicted). Association with carriage state is shown, where blue bars depict the fold-change of the median of normalized abundance in carriage<sup>-</sup> subjects over carriage<sup>+</sup> subjects. Ribbons connect highly correlated ( $r > 0.70$ ) clusters that were associated with Spn carriage status not belonging to the same lineage, with colour indicating the lineage of origin. DN\_T = double negative T cells, Gran = granulocytes, ILC = innate lymphoid cells.

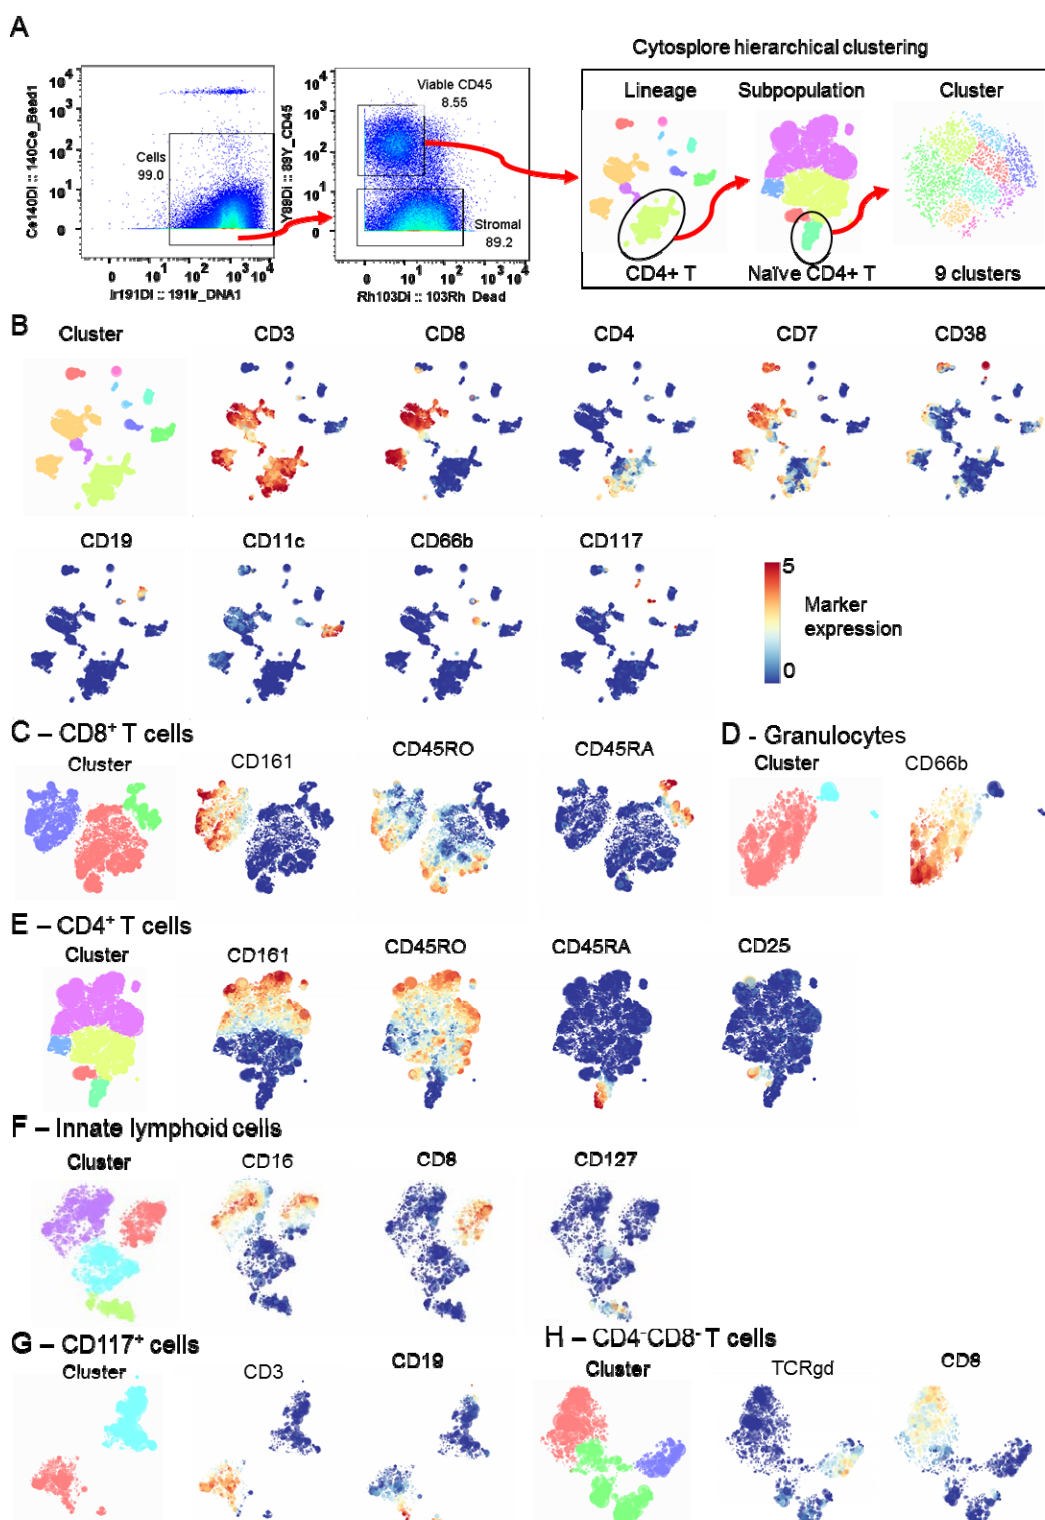

Figure 2. CyTOF analysis strategy. A) CyTOF data files were pre-gated using Flowjo to identify cells (DNA<sup>+</sup> Bead<sup>-</sup>), followed by selecting viable immune cells (CD45<sup>+</sup> Dead<sup>-</sup>). These cells were

exported and loaded in Cytosplore for hierarchical stochastic neighbour embedding (h-sne), in which lineages, subpopulations and clusters were sequentially identified in three steps. Gating for naïve CD4<sup>+</sup> T cells is shown as an example. B) Cells were clustered using all 38 markers minus the epithelial marker Epcam and lineages were then defined based on the expression of nine markers. Clustered lineages and expression of included markers are shown. Subpopulations for C) CD8<sup>+</sup> T cells, D) granulocytes, E) CD4<sup>+</sup> T cells, F) innate lymphoid cells, G) CD117<sup>+</sup> cells and H) double-negative T cells were defined based on the expression of the depicted markers. B cells, plasma cells, myeloid cells were not further divided into subpopulations due to lack of clear clustering by relevant markers. Cell subpopulations were then further divided into clusters using all 38 markers minus the epithelial marker Epcam.

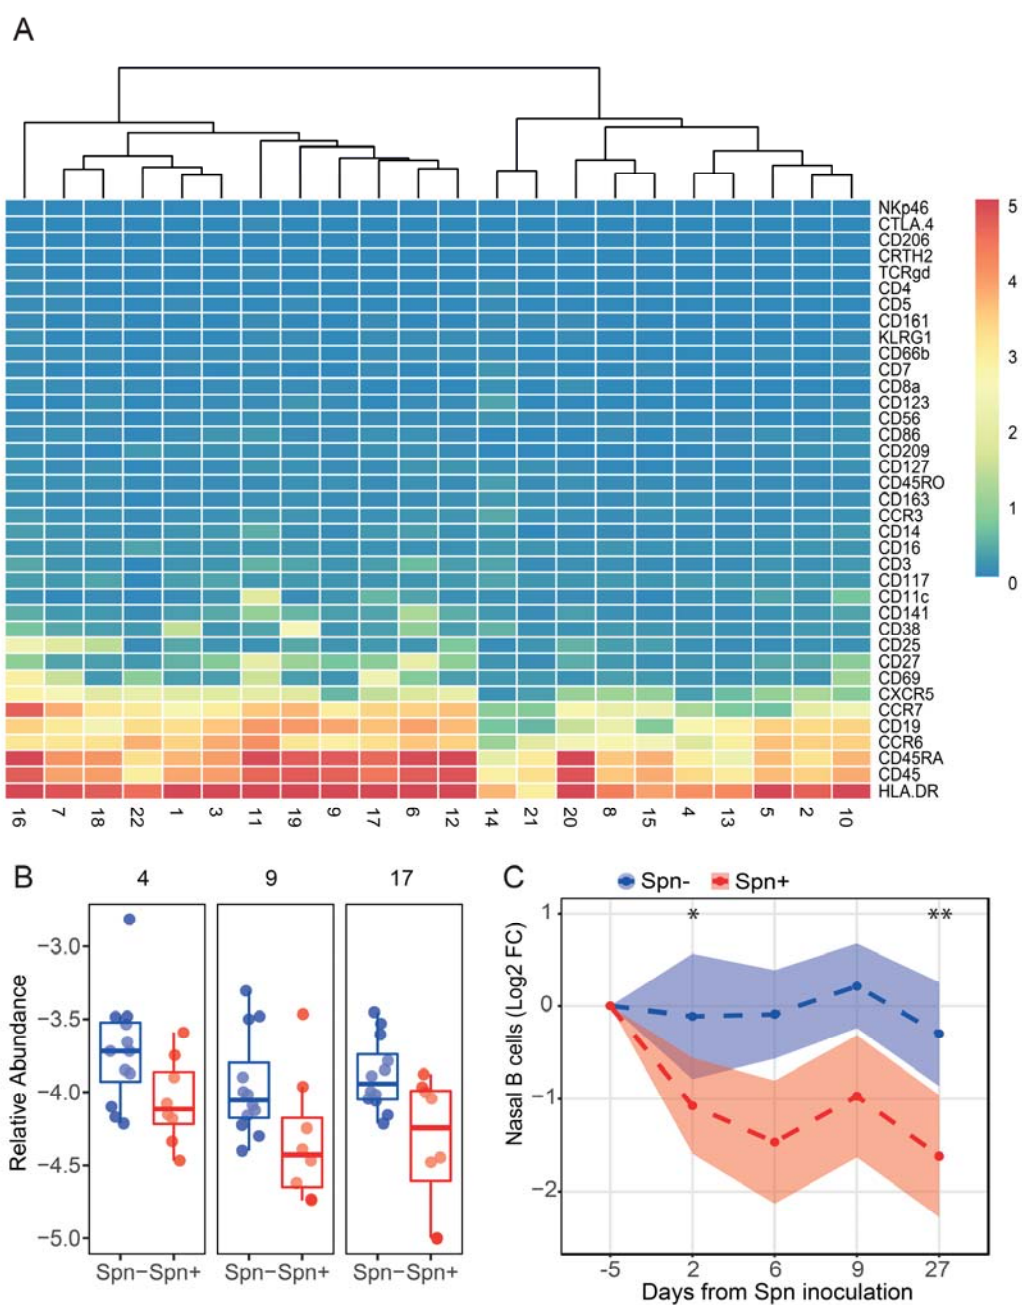

Figure 3. Nasal B cells are depleted following pneumococcal carriage. A) Heatmap showing the expression of thirty-seven markers for all B cell clusters. Clusters were ordered based on similarity and a distance dendrogram is depicted. B) The relative abundance for each of the three significantly higher clusters normalized to stromal cells is expressed on a  $\log_{10}$  scale for carriage<sup>-</sup> (Spn<sup>-</sup>, blue) and carriage<sup>+</sup> (Spn<sup>+</sup>, red) subjects. Boxplot and individual subjects are depicted. C)



Levels of nasal B cells longitudinally measured by flow cytometry from minimally-invasive nasal curettes in an independent cohort for carriage<sup>-</sup> (S<sub>pn</sub><sup>-</sup>, blue, n=52) and carriage<sup>+</sup> (S<sub>pn</sub><sup>+</sup>, red, n= 42) subjects. Mean and standard error of mean of log<sub>2</sub>-transformed fold change levels to baseline are shown. \* p < 0.05, \*\* p < 0.01 by Wilcoxon test comparing to baseline.

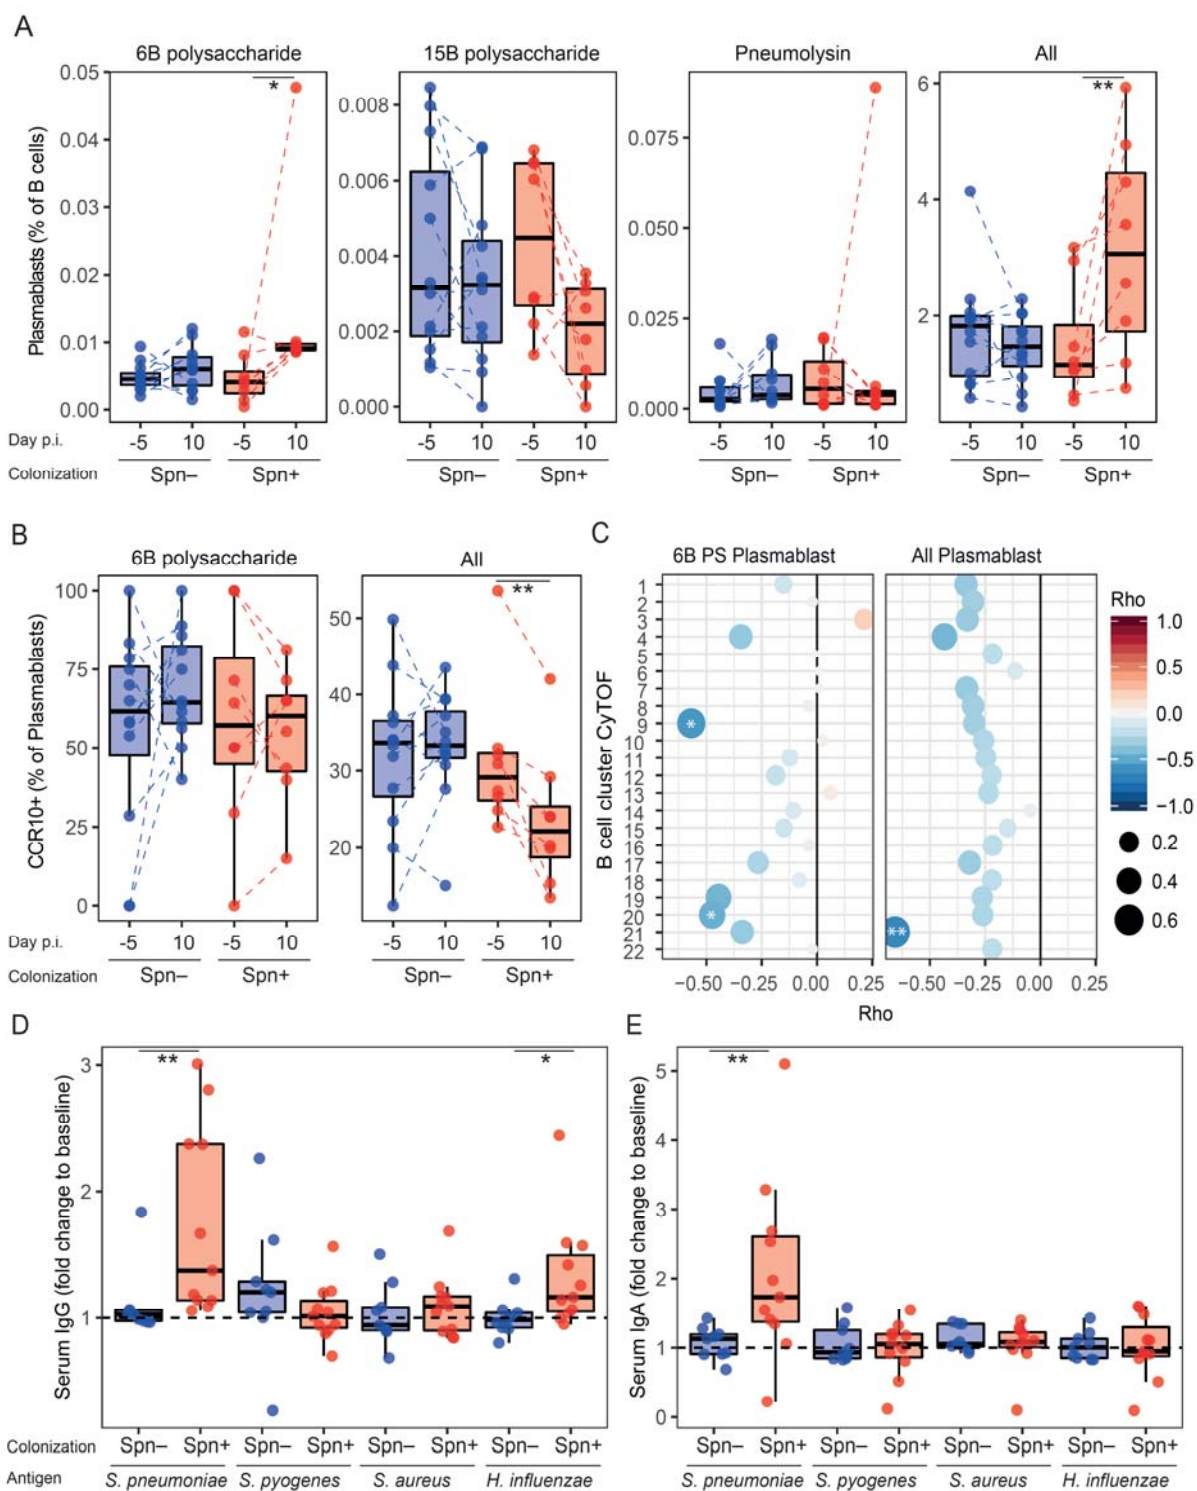

Figure 4. Pneumococcal carriage leads to increased systemic plasmablasts. A) Levels of 6B polysaccharide-specific, 15B polysaccharide-specific, Pneumolysin derivative b (Pneumolysin)-

specific or all plasmablast amongst total B cells were measured from PBMC collected at baseline (Day -5) and at the time of biopsy (Day 10 post inoculation). Boxplots and individual subjects are depicted with carriage<sup>-</sup> in blue (n=12) and carriage<sup>+</sup> in red (n=8), with paired samples connected by dashed lines. \* p < 0.05, \*\* p < 0.01 by Wilcoxon test comparing a group to its baseline. B) Levels of CCR10<sup>+</sup> plasmablasts for 6B-specific and total plasmablasts measured from PBMC collected at baseline (Day -5) and at the time of biopsy (Day 10 post inoculation). Boxplots and individual subjects are depicted with carriage<sup>-</sup> in blue and carriage<sup>+</sup> in red with paired samples connected by dashed lines. \*\* p < 0.01 by Wilcoxon test comparing a group to its baseline. C) Correlations between fold-change in levels of 6B PS-specific and total plasmablasts between baseline and day 10 against levels of B cell clusters measured by CyTOF. Color and size of symbols reflect the Spearman rho value. \* p < 0.05 and \*\* p < 0.01 by Spearman test. Fold change (day 23 post inoculation versus baseline) in levels of D) IgG and E) IgA against *Streptococcus pneumoniae*, *Streptococcus pyogenes*, *Staphylococcus aureus* and *Haemophilus influenzae*. Boxplots and individual subjects are depicted with carriage<sup>-</sup> in blue (Spn-, n=9) and carriage<sup>+</sup> in red (Spn+, n=11). \* p < 0.05, \*\* p < 0.01 by Mann-Whitney test comparing fold-change levels between carriage<sup>-</sup> and carriage<sup>+</sup> subjects.

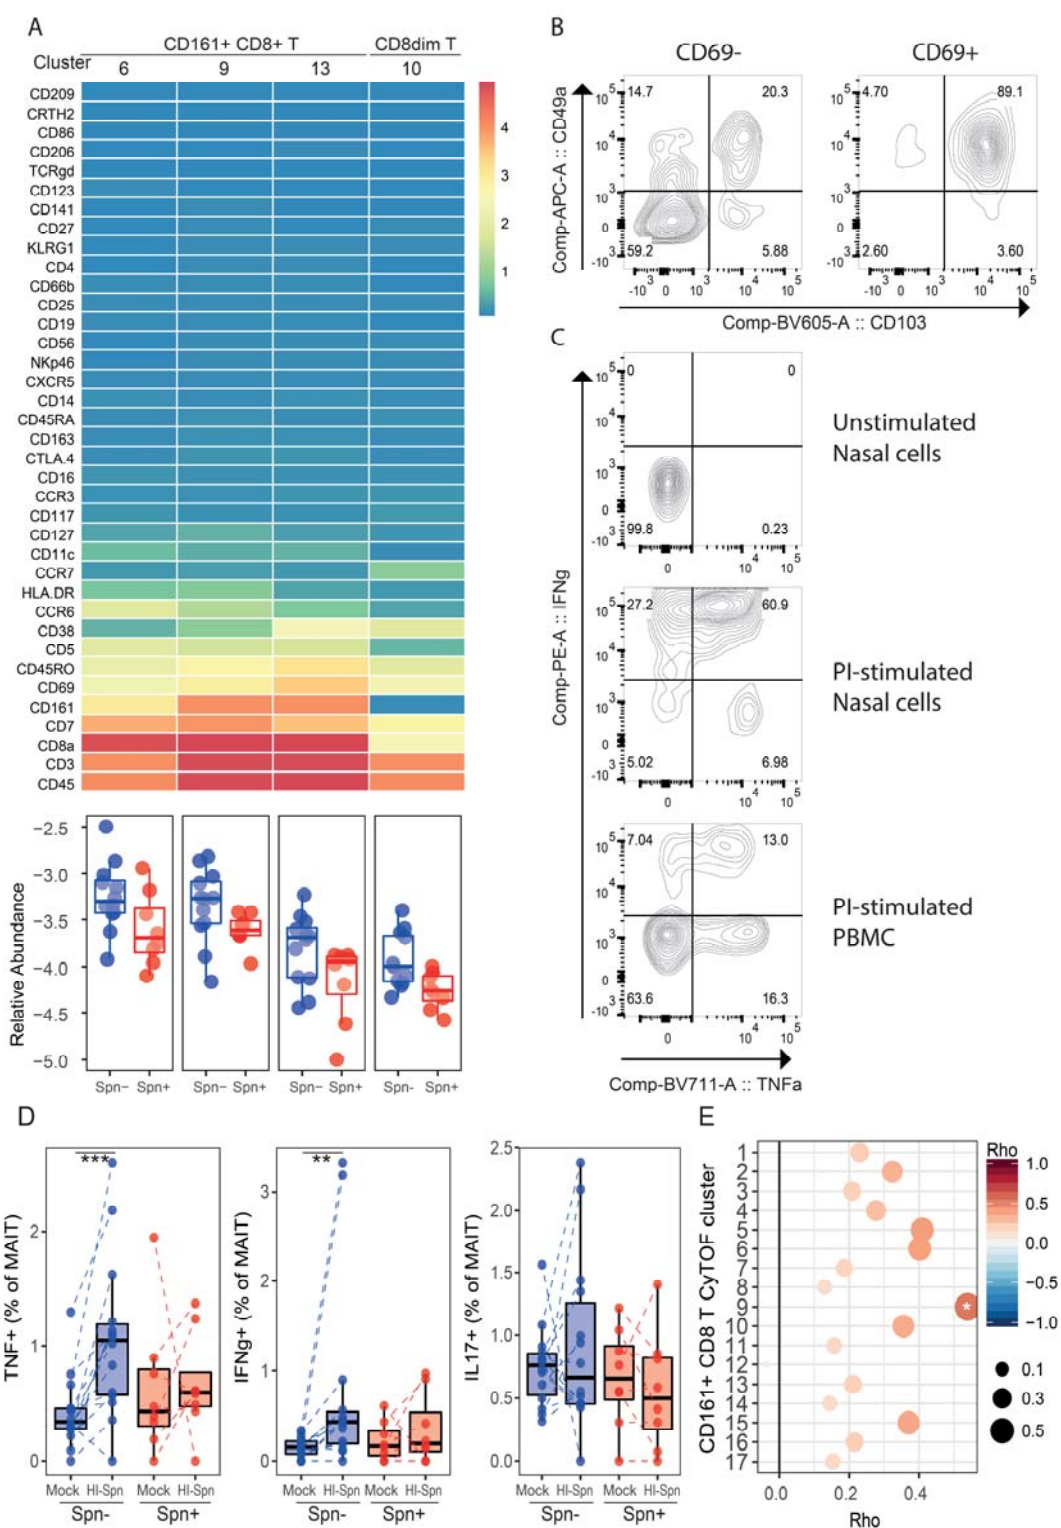

Figure 5. Increased MAIT responses associate with protection from carriage. A) Heatmap showing the expression of thirty-seven markers for each of the four CD8<sup>+</sup> clusters that were significantly

different between carriers and non-carriers. Non-significant CD8<sup>+</sup> T clusters are not shown. Below the heatmap, the abundance for each of the significantly higher clusters normalized to stromal cells is expressed on a log<sub>10</sub> scale for carriage<sup>-</sup> (blue) and carriage<sup>+</sup> (red) subjects. Boxplot and individual subjects are depicted. B) Representative flow cytometry contour plot of CD8<sup>+</sup> CD69<sup>+</sup> and CD8<sup>+</sup> CD69<sup>-</sup> T cells, showing CD103 and CD49a tissue resident marker expression on nasal biopsy cells. C) Representative flow cytometry contour plot of unstimulated nasal biopsy cells, and nasal biopsy cells and PBMC stimulated overnight with PMA and ionomycin (PI) to assess functional capacity. D) TNF, IFN- $\gamma$  and IL-17A production by CD8<sup>+</sup> MAIT cells (CD161<sup>+</sup>TCR $\alpha$ 7.2<sup>+</sup>) after 3-day *in vitro* stimulation with heat-inactivated pneumococcus (HI-Spn) or left unstimulated for carriage<sup>-</sup> (blue, n=14) and carriage<sup>+</sup> (red, n=8) subjects in PBMC collected at baseline. Boxplots and individual subjects, connected by dashed lines, are shown. \*\* p < 0.01 by Wilcoxon test, \*\*\* p < 0.001 by Wilcoxon test. E) Correlations between the difference in cytokine production (total of TNF and IFN- $\gamma$ ) by MAIT cells *in vitro* stimulated with HI-Spn or left unstimulated against CD8<sup>+</sup> CD161<sup>+</sup> T cell clusters measured by CyTOF. Colour and size of symbols reflect the Spearman rho value. \* p < 0.05 by Spearman test.

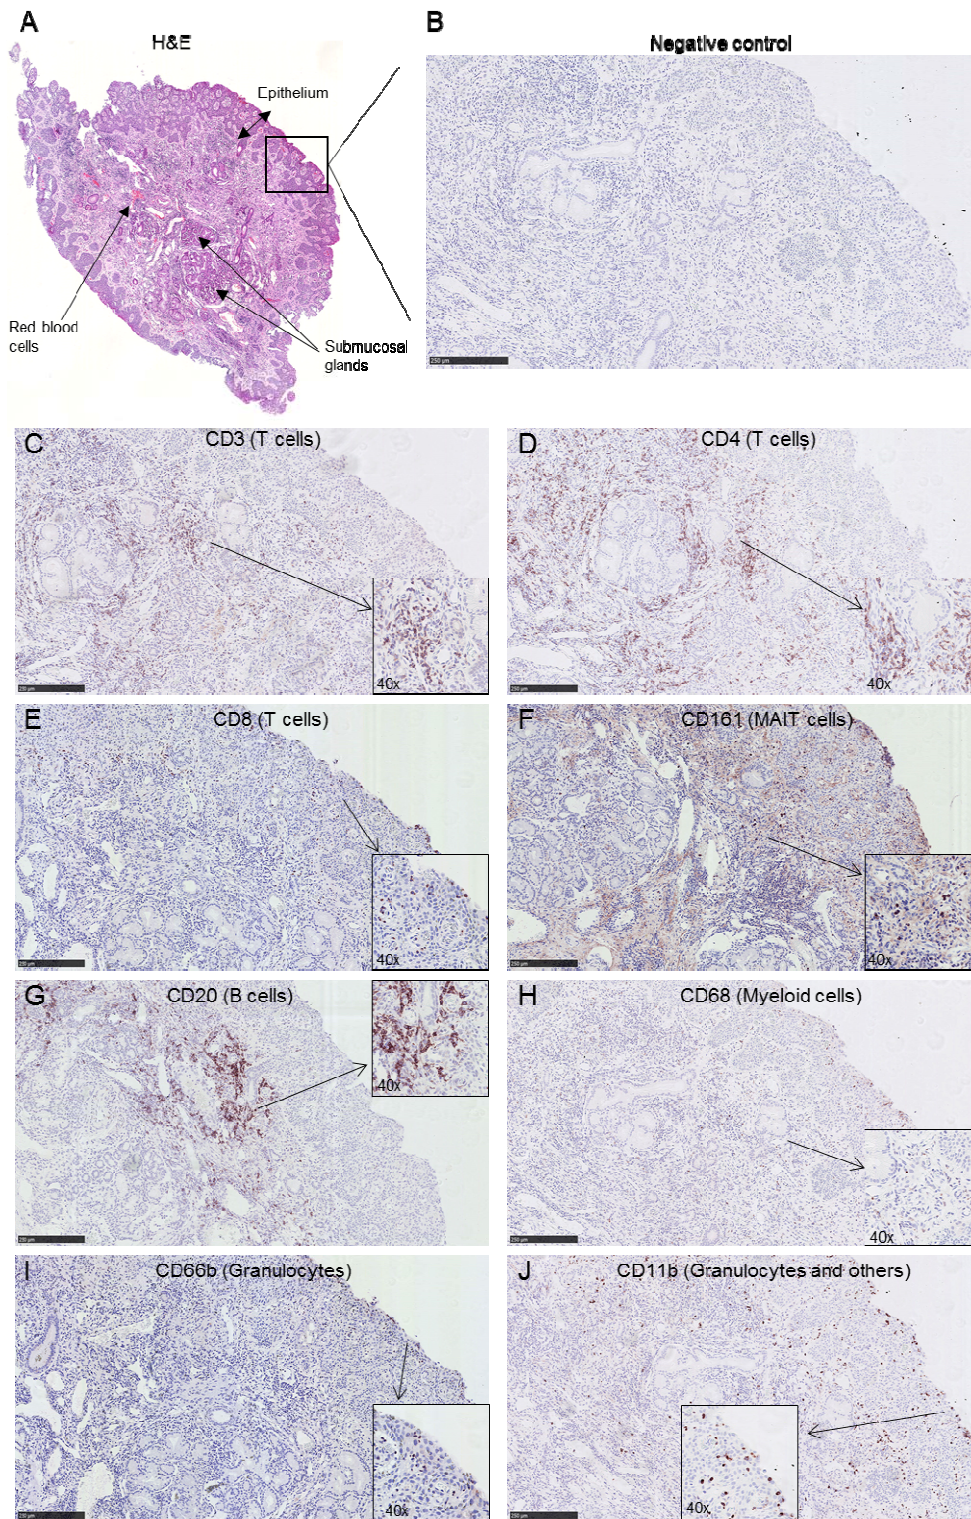

Figure 6. Immunohistochemistry on serial sections of a nasal biopsy. To establish an overall cellular distribution in the tissue a 10x magnification is shown for each of the markers. A 40x inset

is also included to visualize some individual positive cells. A) Haematoxylin and eosin staining showing the entire biopsy. Staining of subsequent slices showing the biopsy at the epithelial edge for the markers B) negative control, C) CD3, D) CD4, E) CD8, F) CD161, G) CD20, H) CD68, I) CD66b and J) CD11b. A scale showing 250 $\mu$ m are added to all panels and a 40x inset is included. Slices were counterstained with haematoxylin and eosin. Some background staining of the extracellular matrix is present for CD161 (panel F).

## Supplemental information

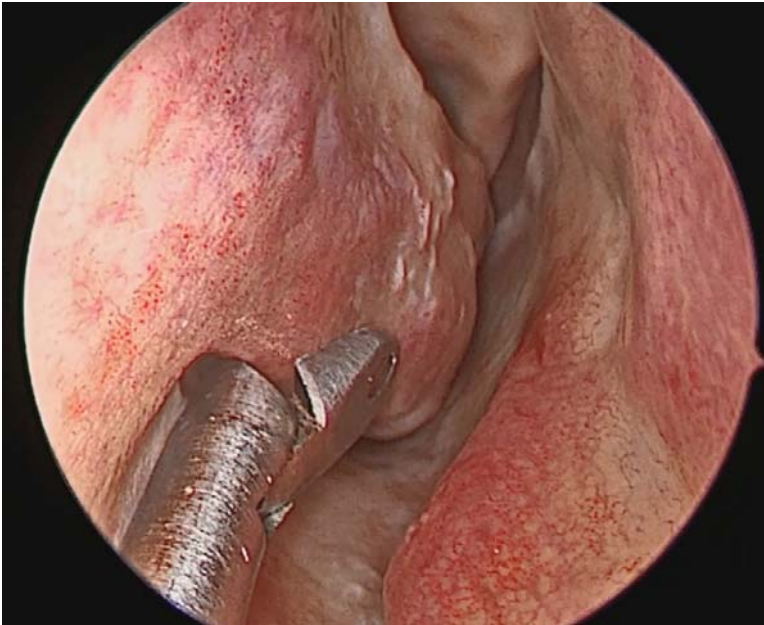

[Supplementary Video 1. Video demonstrating the location and method of nasal biopsy collection.](#)



Supplementary Table 1. List of antibodies used for CyTOF.

| #  | Label             | Specificity    | Clone     |
|----|-------------------|----------------|-----------|
| 1  | <sup>89</sup> Y   | CD45           | HI30      |
| 2  | <sup>115</sup> La | CD5            | UCHT2     |
| 3  | <sup>141</sup> Pr | CD196 (CCR6)   | G034E3    |
| 4  | <sup>142</sup> Nd | CD19           | HIB19     |
| 5  | <sup>143</sup> Nd | CD117 (c-Kit)  | 104D2     |
| 6  | <sup>144</sup> Nd | CD66b          | REA306    |
| 7  | <sup>145</sup> Nd | CD4            | RPA-T4    |
| 8  | <sup>146</sup> Nd | CD8a           | RPA-T8    |
| 9  | <sup>148</sup> Nd | CD14           | M5E2      |
| 10 | <sup>149</sup> Sm | CD25 (IL-2Ra)  | 2A3       |
| 11 | <sup>150</sup> Nd | CD185 (CXCR5)  | J252D4    |
| 12 | <sup>151</sup> Eu | CD123          | 6H6       |
| 13 | <sup>152</sup> Sm | TCRγδ          | 11F2      |
| 14 | <sup>153</sup> Eu | CD7            | CD7-6B7   |
| 15 | <sup>154</sup> Sm | CD163          | GHI/61    |
| 16 | <sup>155</sup> Gd | CD69           | FN50      |
| 17 | <sup>156</sup> Gd | CD294 (CRTH2)  | BM16      |
| 18 | <sup>158</sup> Gd | CD209          | 9E9A8     |
| 19 | <sup>159</sup> Tb | CD197 (CCR7)   | G043H7    |
| 20 | <sup>161</sup> Dy | KLRG1 (MAFA)   | REA261    |
| 21 | <sup>162</sup> Dy | CD11c          | Bu15      |
| 22 | <sup>163</sup> Dy | CD152 (CTLA-4) | BNI3      |
| 23 | <sup>164</sup> Dy | CD161          | HP-3G10   |
| 24 | <sup>165</sup> Ho | CD127 (IL-7Ra) | AO19D5    |
| 25 | <sup>166</sup> Er | CD141          | AD5-14H12 |
| 26 | <sup>167</sup> Er | CD27           | O323      |
| 27 | <sup>168</sup> Er | HLA-DR         | L243      |
| 28 | <sup>169</sup> Tm | CD45RA         | HI100     |
| 29 | <sup>170</sup> Er | CD3            | UCHT1     |
| 30 | <sup>171</sup> Yb | CD206          | 15-2      |
| 31 | <sup>172</sup> Yb | CD38           | HIT2      |
| 32 | <sup>173</sup> Yb | CD45RO         | UCHL1     |
| 33 | <sup>174</sup> Yb | CD335 (NKp46)  | 92E       |
| 34 | <sup>175</sup> Lu | CD193 (CCR3)   | 5E8       |
| 35 | <sup>176</sup> Yb | CD56           | NCAM16.2  |
| 36 | <sup>194</sup> Pt | Epcam          | 51.1      |
| 37 | <sup>198</sup> Pt | CD86           | IT2.2     |
| 38 | <sup>209</sup> Bi | CD16           | 3G8       |

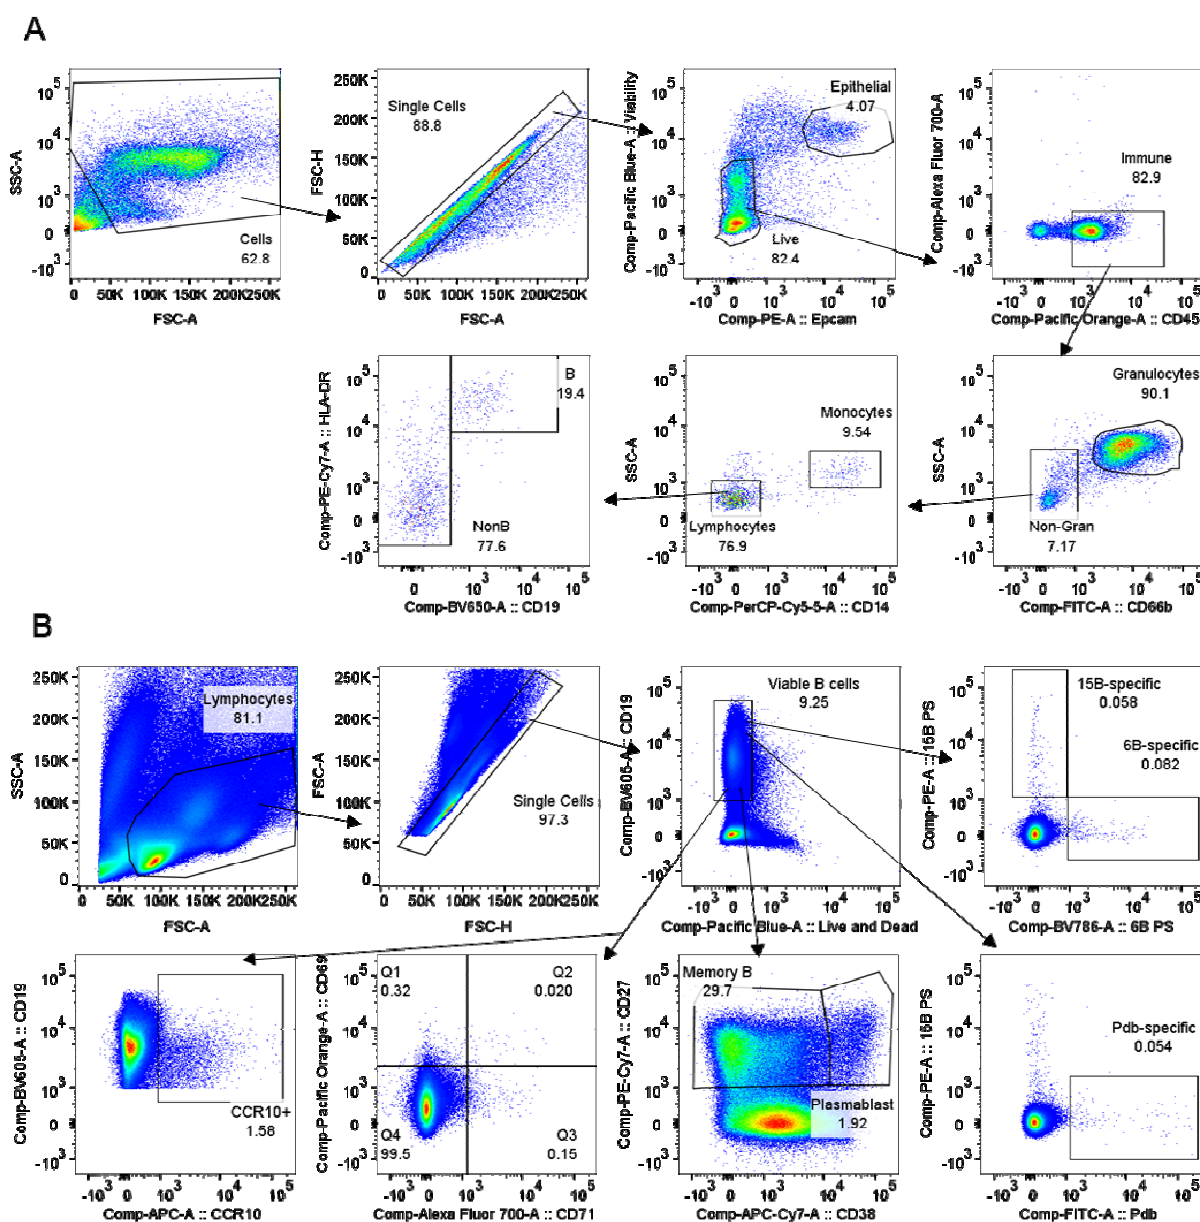

Supplementary Figure 1. B cell validation flow cytometry gating strategies. A) Gating strategy for nasal CD19<sup>+</sup> B cells for a representative nasal curette sample. Each plot shows the cells contained in the precedent gate. Population names and frequencies are shown. B) Gating strategy for the detection of pneumococcus-specific B cells. Each plot shows the cells contained in the precedent gate. Population and frequency are shown. Gates were set on all B cells and copied into Spn-specific populations.

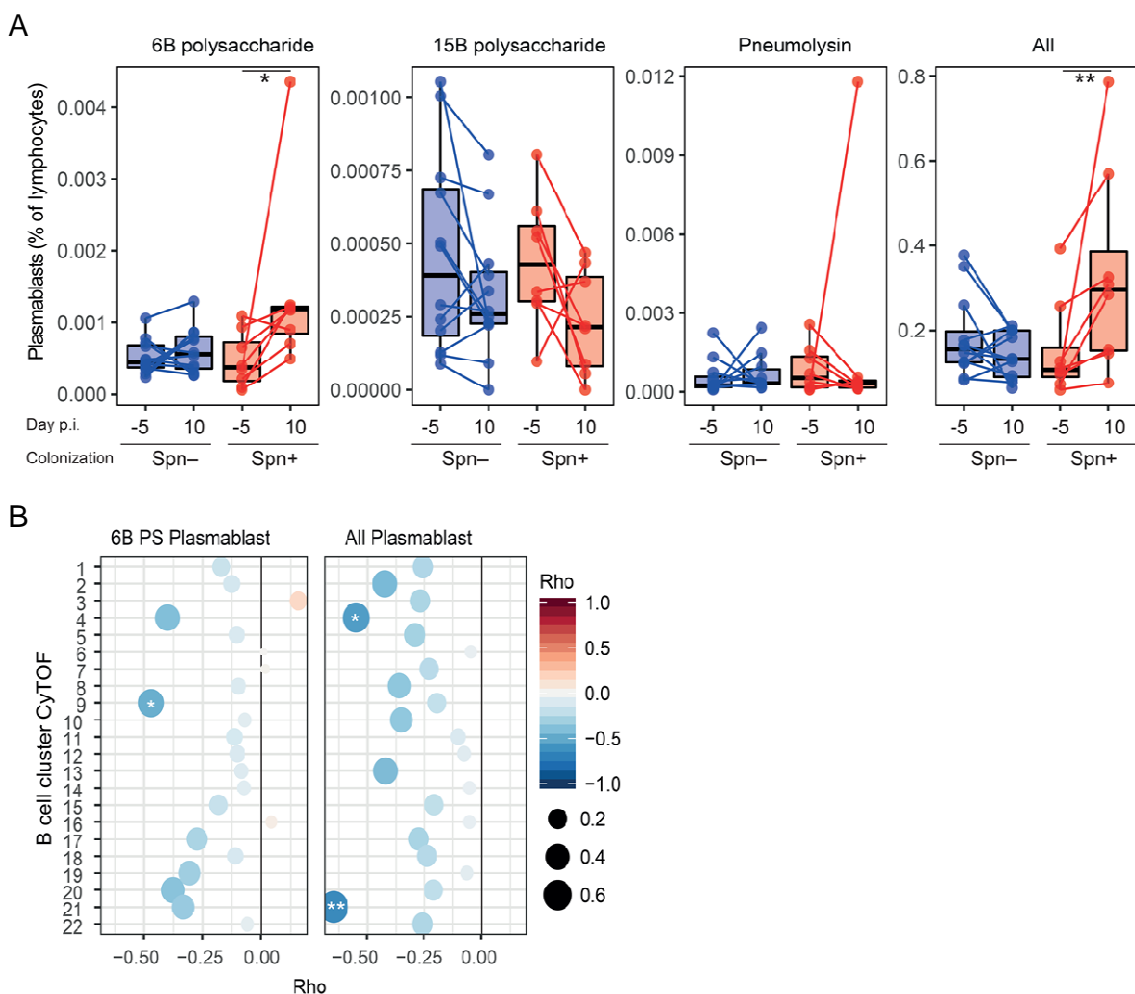

Supplementary Figure 2. Normalization of circulating plasmablasts to total lymphocyte numbers. A) Levels of 6B polysaccharide-specific, 15B polysaccharide-specific, Pneumolysin derivative b (Pneumolysin)-specific or all plasmablast amongst total lymphocytes were measured from PBMC collected at baseline (Day -5) and at the time of biopsy (Day 10 post inoculation). Boxplots and individual subjects are depicted with carriage- in blue (n=12) and carriage+ in red (n=8), with paired samples connected by dashed lines. \*  $p < 0.05$ , \*\*  $p < 0.01$  by Wilcoxon test comparing a group to its baseline. B) Correlations between fold-change in levels of 6B PS-specific and total plasmablasts between baseline and day 10 normalized against total number of lymphocytes against

levels of B cell clusters measured by CyTOF. Color and size of symbols reflect the Spearman rho value. \*  $p < 0.05$  and \*\*  $p < 0.01$  by Spearman test.

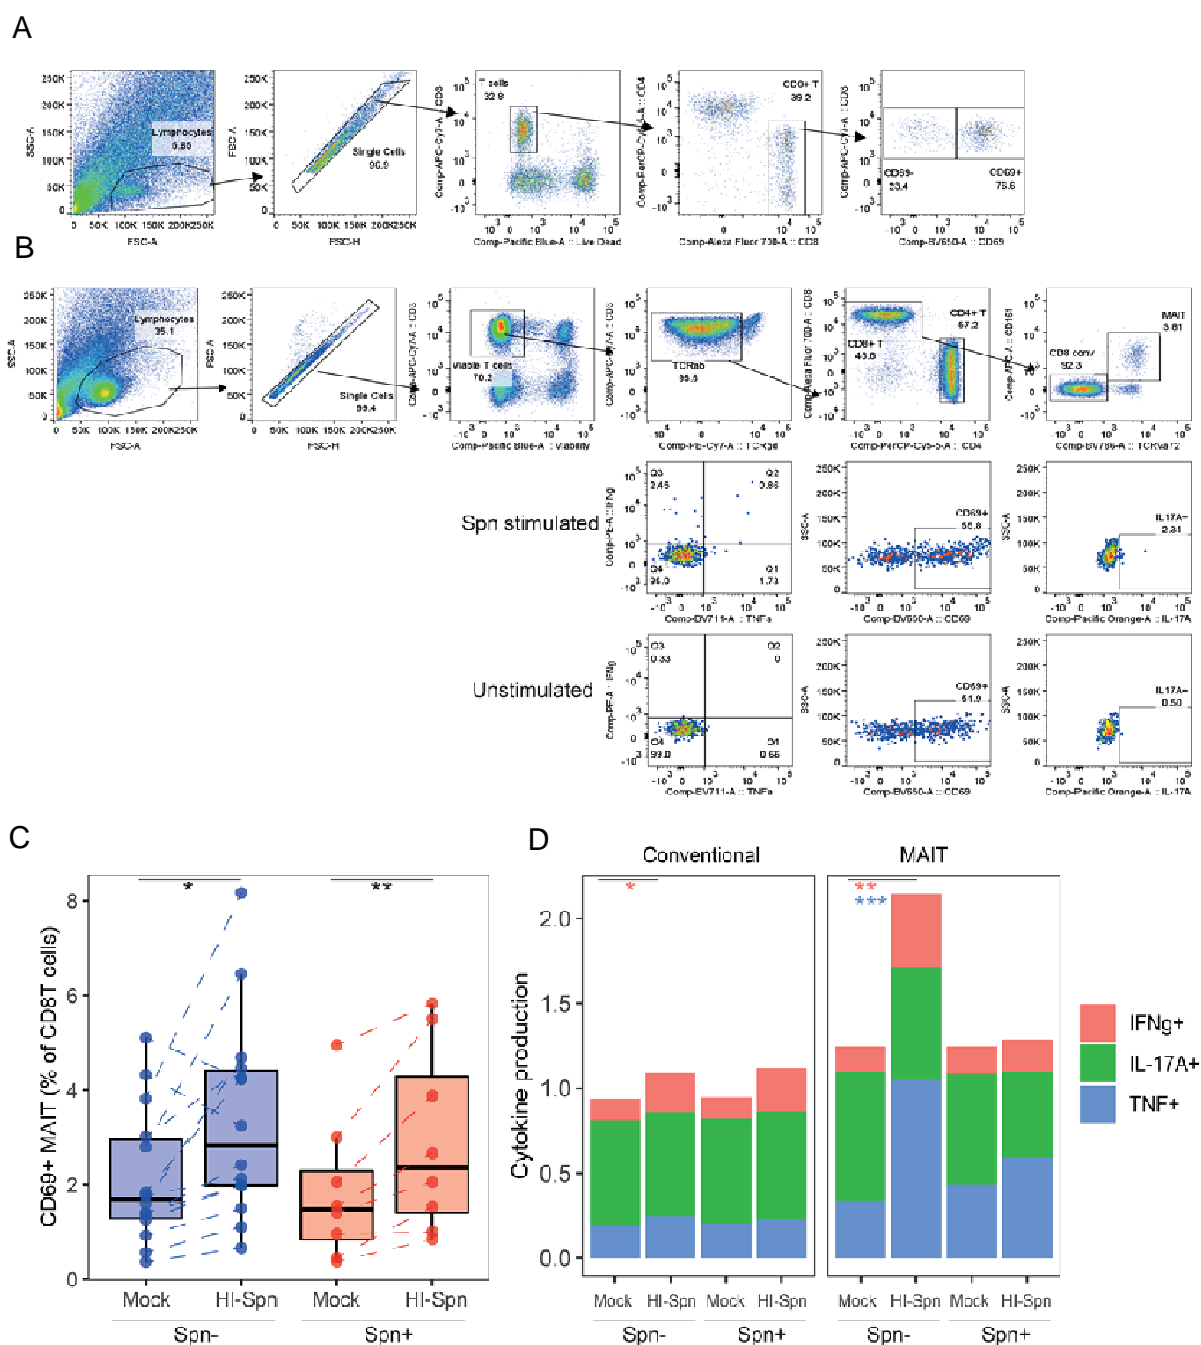

Supplementary Figure 3. CD8<sup>+</sup> T cell flow cytometry gating strategies. A) Gating strategy for CD8<sup>+</sup> T tissue-resident memory cells by flow cytometry for a representative nasal biopsy. Each plot shows the cells contained in the precedent gate. Population and frequency are shown. B) Gating strategy to detect CD8<sup>+</sup> mucosal associated invariant T

cells in PBMC. One representative heat-inactivated pneumococcus (HI-Spn)-stimulated sample is depicted. For cytokine production and CD69 activation large dots are used to better show rare events. Each plot shows the cells contained in the precedent gate. Population and frequency are shown. C) Levels of CD69 on MAIT cells after stimulation or not. Individuals are shown and connected by lines and boxplots are overlaid. D) Stacked bar charts showing the median level of cytokine production (IFN- $\gamma$  in red, IL-17A in green and TNF in blue) for conventional and MAIT CD8+ T cells. \* $p < 0.05$ , \*\* $p < 0.01$ , \*\*\* $p < 0.001$  by Wilcoxon test.

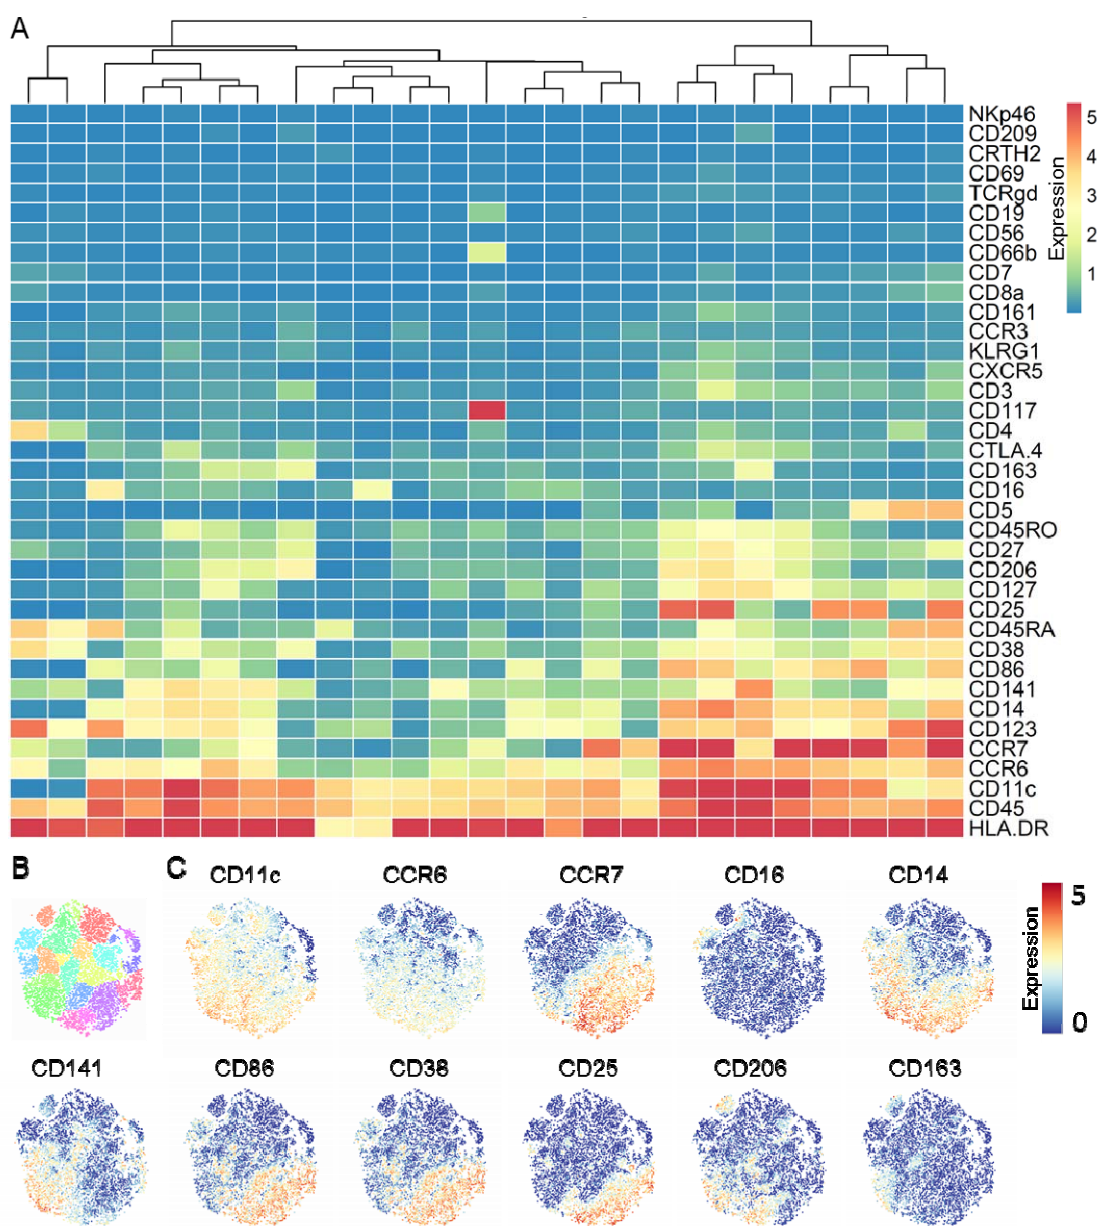

Supplementary Figure 4. Nasal monocytes/macrophages are predominantly CD14<sup>+</sup> CD16<sup>-</sup> classical monocytes. A) Heatmap showing for each of the monocyte clusters (columns) the expression for thirty-seven markers (rows). Markers are ordered by increasing median expression. Columns are re-ordered and a cluster dendrogram is shown. B) Cluster definition within the myeloid cell lineage. C) Fingerprint graphs showing expression for selected markers on a single-cell level.

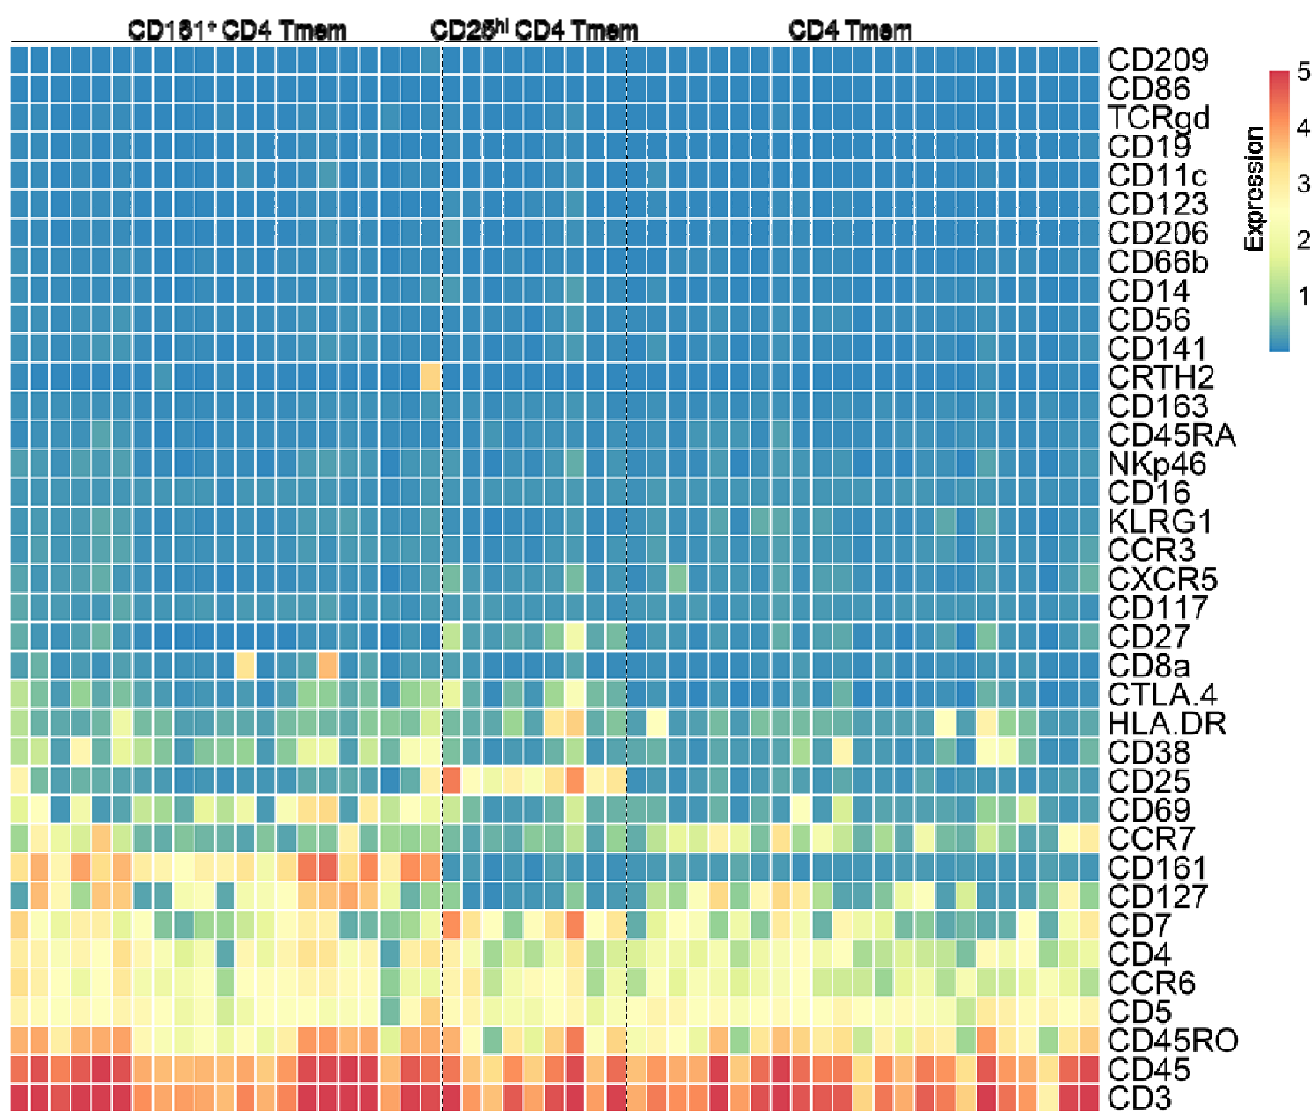

Supplementary Figure 5. Nasal memory CD4 T cell phenotype. Heatmap including each of the three memory (CD45RO<sup>+</sup>) CD4<sup>+</sup> T cell subpopulations within the CD4<sup>+</sup> T cell lineage. All identified clusters (columns) with expression for thirty-seven markers (rows) are shown. Clusters belonging to the CD161<sup>+</sup>, CD25<sup>hi</sup> and CD4 T memory (Tmem) subpopulations are separated by dashed lines. Markers are ordered by increasing median expression.
